# Supplementary material
Source: PubMed Central journal article supplement (PMC10294775)
Supplement: NIHMS1893070-supplement-4.pdf [file NIHMS1893070-supplement-4.pdf]

| bNACHT Number | Domain Architecture | NACHT Clade | Source genome                                   | N-term (effector)      | C-term (sensor)                               | Length (aa) |
|---------------|---------------------|-------------|-------------------------------------------------|------------------------|-----------------------------------------------|-------------|
| bNACHT01      |                     | 14          | <i>Klebsiella pneumoniae</i> MGH 35             | -                      | SNaCT                                         | 609         |
| bNACHT02      |                     | 14          | <i>Escherichia coli</i> ECOR34                  | -                      | SNaCT                                         | 634         |
| bNACHT04      |                     | 14          | <i>Klebsiella pneumoniae</i> UCICRE 8           | -                      | SNaCT                                         | 652         |
| bNACHT09      |                     | 15          | <i>Escherichia coli</i> 3-105-05S4 C1           | TIR                    | Pentapeptide Repeat + Winged Helix-Turn-Helix | 957         |
| bNACHT11      |                     | 14          | <i>Klebsiella pneumoniae</i> 4300STDY6470423    | -                      | SNaCT                                         | 639         |
| bNACHT12      |                     | 14          | <i>Escherichia coli</i> HVH 41                  | -                      | SNaCT                                         | 612         |
| bNACHT13      |                     | 8           | <i>Klebsiella quasipneumoniae</i> TUM14048      | TM                     | TM                                            | 1021        |
| bNACHT16      |                     | 4           | <i>Vibrio campbellii</i> CAIM 519               | α-h1                   | LRR                                           | 950         |
| bNACHT20      |                     | 2           | <i>Escherichia coli</i> 2014C-3338              | Metallophosphoesterase | Tetratricopeptide Repeat                      | 1050        |
| bNACHT22      |                     | 14          | <i>Escherichia coli</i> ECOR36                  | -                      | SNaCT                                         | 652         |
| bNACHT23      |                     | 14          | <i>Escherichia coli</i> ECOR08                  | -                      | SNaCT                                         | 645         |
| bNACHT24      |                     | 14          | <i>Escherichia coli</i> ECOR35                  | -                      | SNaCT                                         | 652         |
| bNACHT25      |                     | 6           | <i>Escherichia coli</i> ECOR11                  | REase                  | HEAT                                          | 752         |
| bNACHT27      |                     | 2           | <i>Enterobacter asburiae</i> RHBSTW-00831       | REase                  | Tetratricopeptide Repeat                      | 1473        |
| bNACHT28      |                     | 20          | <i>Escherichia coli</i> TzEc064                 | -                      | Tetratricopeptide Repeat                      | 615         |
| bNACHT30      |                     | 2           | <i>Klebsiella pneumoniae</i> 4300STDY6470402    | -                      | -                                             | 572         |
| bNACHT32      |                     | 6           | <i>Escherichia coli</i> RU1 MA4                 | REase                  | HEAT                                          | 753         |
| bNACHT34      |                     | 15          | <i>Escherichia coli</i> NCTC9088                | Schlafen               | Pentapeptide Repeat + Winged Helix-Turn-Helix | 979         |
| bNACHT37      |                     | 2           | <i>Enterobacter roggenkampii</i> MGH 34         | Sirtuin                | Tetratricopeptide Repeat                      | 1118        |
| bNACHT42      |                     | ?           | <i>Klebsiella varicola</i> 5012STDY7312728      | Beta propeller         | -                                             | 1042        |
| bNACHT43      |                     | 3           | <i>Klebsiella varicola</i> WUSM_KV_03           | Peptidase              | -                                             | 749         |
| bNACHT44      |                     | 4           | <i>Pseudomonas viridiflava</i> CDRTc14          | -                      | LRR                                           | 630         |
| bNACHT45      |                     | 4           | <i>Pseudomonas sp.</i> LAIL14HWK12:16           | -                      | LRR                                           | 954         |
| bNACHT64      |                     | 20          | <i>Escherichia coli</i> JML132                  | -                      | Tetratricopeptide Repeat + REase              | 1468        |
| bNACHT67      |                     | 6           | <i>Klebsiella michiganensis</i> 2880STDY5682685 | REase                  | -                                             | 921         |
| bNACHT69      |                     | 15          | <i>Klebsiella pneumoniae</i> CRK0035            | REase                  | Pentapeptide Repeat + Winged Helix-Turn-Helix | 743         |
| bNACHT70      |                     | 7           | <i>Escherichia coli</i> LMR3158                 | REase                  | Tetratricopeptide Repeat                      | 1330        |
