# Supplementary material
Source: PubMed Central journal article supplement (PMC10294775)
Supplement: NIHMS1893070-supplement-10.pdf [file NIHMS1893070-supplement-10.pdf]

Supplementary File  
Tests for alternative tree topologies

CONTENTS

1. Caterpillar clade (#12 on Figure 2) -- animal transfer from bacteria
2. C-terminal pentapeptides and beta-propeller clade (#10 on Figure 2) -- ciliate transfer from bacteria
3. Ancient archaeo-eukaryotic clade (#19, Figure 2) -- transfer from archaea to Kipferlia diplomonad
4. FGS fungal clade (#25, Figure 2) -- transfer from bacteria to fungi

TABLE LEGEND/EXPLANATIONS:

deltaL : logL difference from the maximal logl in the set.  
bp-RELL : bootstrap proportion using REll method (Kishino et al. 1990).  
p-KH : p-value of one sided Kishino-Hasegawa test (1989).  
p-SH : p-value of Shimodaira-Hasegawa test (2000).  
p-WKH : p-value of weighted KH test.  
p-WSH : p-value of weighted SH test.  
c-ELW : Expected Likelihood Weight (Strimmer & Rambaut 2002).  
p-AU : p-value of approximately unbiased (AU) test (Shimodaira, 2002).

Plus signs denote the 95% confidence sets.  
Minus signs denote significant exclusion.  
All tests run with 10000 replicates.

1. Caterpillar clade (#12 on Figure 2) -- animal transfer from bacteria

TABLE SUMMARY

0/48 trees passing all tests violate proposed HGT

Consensus tree of trees passing all tests (newick format, UFBootstrap values provided):  
(AAY61704.1 Rfel backtransfbc,ABV78546.1 Rbel backtransfbc,(((ETO08121.1 Rfil caterpillar\_,ETO18216.1 Rfil caterpillar )100,((((PFX17342.1\_\_coral\_LRR-exp,XP\_020912409.1\_\_coral\_LRR-exp)100,XP\_015773435.1 Adig caterpillar )100,(((NP\_001028379.2 Mmus caterpillar,XP\_006721361.1\_\_Hsap\_caterpillar)100,XP\_018113284.1 Xlaev caterpillar)58,((XP\_026695725.1 Cint caterpillar,(EAW90326.1 Hsap caterpillar,NP\_113566.2 Mmus caterpillar)100)88,NP\_001107787.1 Drer caterpillar)63)90)96,(XP\_019858719.1\_\_Aque\_LRR-exp,(XP\_019858744.1\_\_Aque\_LRR-exp,XP\_019852853.1\_\_Aque\_LRR-exp)92)100)75,((((XP\_030850910.1 Spur caterpillar,((XP\_019643334.1 Branch LRR-exp,XP\_019643331.1 Branch LRR-exp)100,XP\_002590671.1 Branch LRR-exp)100)60,XP\_019632330.1 Branch caterpillar\_)38,(XP\_032236996.1\_\_Nvec\_LRR-exp,XP\_032226299.1 Nvec LRR-exp)100)52,(((WP\_063874077.1 HTH N HEATs NH-Cmotif,WP\_127086937.1\_\_HTH\_N\_\_HEATs\_NH-Cmotif\_abNX1)96,WP\_068789484.1\_\_EAD4\_TRADDN\_N\_\_HEATs\_NH-Cmotif abNX1)100,((WP\_088241405.1 TMs N FGS,(WP\_081656175.1 6TM N FGS GUN4 FGS,WP\_096563283.1\_\_EAD1\_N\_\_FGS\_GUN4)96)94,(WP\_132172700.1\_\_TMs\_N\_\_FGS,WP\_169816302.1\_\_N\_\_FGS\_Cterm-FGSa)96)100)94,(((ACY15693.1 Hoch bcat,AEI64901.1 Cmac bcat)98,AKT40456.1 Ccro bcat)100,AMV27545.1 Gemm bcat)100)

94, (( (ACY15693.1\_\_Hoch\_bcat, AEI64901.1\_\_Cmac\_bcat) 98, AKT40456.1\_\_Ccro\_bcat) 100, AMV27545.1\_\_Gemm\_bcat) 100) 100) 67) 94) 100);

| Tree | logL         | deltaL   | bp-RELL  | p-KH     | p-SH     | p-WKH    | p-WSH    | c-ELW      | p-AU       |
|------|--------------|----------|----------|----------|----------|----------|----------|------------|------------|
| 1    | -37842.66532 | 0        | 0.0065 + | 0.497 +  | 1 +      | 0.497 +  | 1 +      | 0.0269 +   | 0.963 +    |
| 2    | -37886.16398 | 43.499   | 0 -      | 0.0003 - | 0.12 +   | 0.0001 - | 0.0035 - | 2.36e-08 - | 3.57e-06 - |
| 3    | -37892.37817 | 49.713   | 0 -      | 0.0018 - | 0.0569 + | 0.0006 - | 0.0119 - | 2.64e-06 - | 0.000354 - |
| 4    | -38002.96523 | 160.3    | 0 -      | 0 -      | 0 -      | 0 -      | 0 -      | 1.43e-40 - | 2.87e-74 - |
| 5    | -37872.30286 | 29.638   | 0.0001 - | 0.0107 - | 0.369 +  | 0.0062 - | 0.0637 + | 0.000131 - | 0.00554 -  |
| 6    | -37857.68666 | 15.021   | 0.0114 + | 0.097 +  | 0.847 +  | 0.0708 + | 0.678 +  | 0.0105 +   | 0.113 +    |
| 7    | -37858.11228 | 15.447   | 0.0043 + | 0.0719 + | 0.806 +  | 0.0322 - | 0.397 +  | 0.00379 +  | 0.0482 -   |
| 8    | -37849.01728 | 6.352    | 0.0091 + | 0.15 +   | 0.98 +   | 0.0923 + | 0.79 +   | 0.0093 +   | 0.245 +    |
| 9    | -37862.98267 | 20.317   | 0.0013 - | 0.0326 - | 0.666 +  | 0.0135 - | 0.254 +  | 0.0012 -   | 0.0341 -   |
| 10   | -37889.73889 | 47.074   | 0 -      | 0.0007 - | 0.085 +  | 0.0001 - | 0.0021 - | 8.53e-11 - | 2.78e-06 - |
| 11   | -37881.85677 | 39.191   | 0 -      | 0.0026 - | 0.141 +  | 0.0005 - | 0.0177 - | 2.3e-06 -  | 0.000138 - |
| 12   | -37871.69068 | 29.025   | 0.0001 - | 0.0134 - | 0.366 +  | 0.0034 - | 0.0687 + | 0.000122 - | 0.0111 -   |
| 13   | -37844.01329 | 1.348    | 0.0564 + | 0.398 +  | 1 +      | 0.398 +  | 0.999 +  | 0.0511 +   | 0.74 +     |
| 14   | -37962.19224 | 119.53   | 0 -      | 0 -      | 0 -      | 0 -      | 0 -      | 1.99e-25 - | 8.2e-157 - |
| 15   | -37849.06788 | 6.4026   | 0.0111 + | 0.211 +  | 0.994 +  | 0.207 +  | 0.985 +  | 0.0147 +   | 0.409 +    |
| 16   | -37845.40601 | 2.7407   | 0.0085 + | 0.239 +  | 1 +      | 0.208 +  | 0.996 +  | 0.0132 +   | 0.619 +    |
| 17   | -37916.49007 | 73.825   | 0 -      | 0 -      | 0.0028 - | 0 -      | 0 -      | 6.53e-15 - | 0.00517 -  |
| 18   | -37859.65133 | 16.986   | 0.0004 - | 0.0144 - | 0.781 +  | 0.0145 - | 0.261 +  | 0.000395 - | 0.0124 -   |
| 19   | -37871.79075 | 29.125   | 0 -      | 0.0114 - | 0.357 +  | 0.007 -  | 0.123 +  | 6.31e-06 - | 0.00407 -  |
| 20   | -37873.26782 | 30.602   | 0 -      | 0.0097 - | 0.315 +  | 0.003 -  | 0.0575 + | 1.29e-05 - | 0.00706 -  |
| 21   | -37870.4044  | 27.739   | 0 -      | 0.0095 - | 0.431 +  | 0.0011 - | 0.0197 - | 1.35e-05 - | 0.0102 -   |
| 22   | -37889.19509 | 46.53    | 0 -      | 0.0004 - | 0.0756 + | 0.0001 - | 0.008 -  | 5.13e-10 - | 0.000702 - |
| 23   | -37923.61637 | 80.951   | 0 -      | 0 -      | 0.002 -  | 0 -      | 0.0002 - | 9.6e-16 -  | 0.00116 -  |
| 24   | -37848.38771 | 5.7224   | 0.0137 + | 0.166 +  | 0.993 +  | 0.131 +  | 0.915 +  | 0.014 +    | 0.393 +    |
| 25   | -37925.48389 | 82.819   | 0 -      | 0 -      | 0.0022 - | 0 -      | 0.0003 - | 8.86e-17 - | 0.000333 - |
| 26   | -37855.59435 | 12.929   | 0.003 -  | 0.0669 + | 0.912 +  | 0.0667 + | 0.702 +  | 0.00315 -  | 0.105 +    |
| 27   | -37859.24533 | 16.58    | 0.0017 - | 0.0225 - | 0.745 +  | 0.0225 - | 0.275 +  | 0.0016 -   | 0.07 +     |
| 28   | -37904.99394 | 62.329   | 0 -      | 0.0001 - | 0.0075 - | 0 -      | 0.0006 - | 4.9e-12 -  | 4e-06 -    |
| 29   | -37856.11323 | 13.448   | 0.0025 - | 0.0501 + | 0.876 +  | 0.0405 - | 0.522 +  | 0.00243 -  | 0.0714 +   |
| 30   | -37842.6654  | 8.82e-05 | 0.0108 + | 0.502 +  | 1 +      | 0.502 +  | 1 +      | 0.0267 +   | 0.964 +    |
| 31   | -37894.30041 | 51.635   | 0 -      | 0.0011 - | 0.0485 - | 0.0002 - | 0.0061 - | 1.74e-07 - | 3.76e-05 - |
| 32   | -37894.67887 | 52.014   | 0 -      | 0.0016 - | 0.0485 - | 0.0008 - | 0.0087 - | 1.39e-08 - | 0.000392 - |
| 33   | -37844.70186 | 2.0365   | 0.0465 + | 0.39 +   | 1 +      | 0.39 +   | 1 +      | 0.0462 +   | 0.808 +    |
| 34   | -37870.52307 | 27.858   | 0.0004 - | 0.0227 - | 0.408 +  | 0.012 -  | 0.174 +  | 0.000479 - | 0.00907 -  |
| 35   | -37863.36964 | 20.704   | 0.0002 - | 0.02 -   | 0.655 +  | 0.0161 - | 0.242 +  | 0.000336 - | 0.0174 -   |
| 36   | -37843.07722 | 0.4119   | 0.0086 + | 0.324 +  | 1 +      | 0.323 +  | 1 +      | 0.0196 +   | 0.822 +    |
| 37   | -37903.83618 | 61.171   | 0 -      | 0.0001 - | 0.0115 - | 0 -      | 0.0002 - | 9.29e-13 - | 0.00115 -  |
| 38   | -37864.40542 | 21.74    | 0 -      | 0.0196 - | 0.616 +  | 0.0047 + | 0.0817 + | 0.000101 - | 0.0139 -   |
| 39   | -37844.79094 | 2.1256   | 0.0481 + | 0.389 +  | 1 +      | 0.39 +   | 1 +      | 0.0444 +   | 0.746 +    |
| 40   | -37874.13311 | 31.468   | 0.0001 - | 0.0084 - | 0.285 +  | 0.0045 - | 0.0874 + | 3.23e-05 - | 0.00309 -  |
| 41   | -37852.61898 | 9.9537   | 0.0057 + | 0.101 +  | 0.96 +   | 0.102 +  | 0.837 +  | 0.00573 +  | 0.135 +    |
| 42   | -37849.26697 | 6.6017   | 0.0008 - | 0.0581 + | 0.986 +  | 0.0579 + | 0.703 +  | 0.00333 -  | 0.159 +    |
| 43   | -37912.48397 | 69.819   | 0 -      | 0 -      | 0.002 -  | 0 -      | 0.0001 - | 1.85e-14 - | 0.00104 -  |

|    |              |         |        |   |        |   |        |   |        |   |        |   |          |   |          |   |
|----|--------------|---------|--------|---|--------|---|--------|---|--------|---|--------|---|----------|---|----------|---|
| 44 | -37849.06793 | 6.4026  | 0.0135 | + | 0.211  | + | 0.994  | + | 0.208  | + | 0.988  | + | 0.0147   | + | 0.412    | + |
| 45 | -37866.43657 | 23.771  | 0      | - | 0.0019 | - | 0.54   | + | 0.0019 | - | 0.0314 | - | 2.29e-05 | - | 0.00659  | - |
| 46 | -37902.31736 | 59.652  | 0      | - | 0.0002 | - | 0.0135 | - | 0.0002 | - | 0.0013 | - | 7.68e-11 | - | 0.00162  | - |
| 47 | -37856.59692 | 13.932  | 0.0037 | - | 0.0745 | + | 0.883  | + | 0.065  | + | 0.66   | + | 0.00359  | - | 0.0847   | + |
| 48 | -37876.98503 | 34.32   | 0      | - | 0.0042 | - | 0.231  | + | 0.0029 | - | 0.0452 | - | 9.67e-06 | - | 0.0317   | - |
| 49 | -37890.72846 | 48.063  | 0      | - | 0.0013 | - | 0.0554 | + | 0.001  | - | 0.0092 | - | 9.11e-09 | - | 0.000258 | - |
| 50 | -37852.86507 | 10.2    | 0.0082 | + | 0.115  | + | 0.955  | + | 0.114  | + | 0.858  | + | 0.00755  | + | 0.188    | + |
| 51 | -37884.99936 | 42.334  | 0      | - | 0.0033 | - | 0.116  | + | 0.0025 | - | 0.0514 | + | 5.46e-05 | - | 0.00914  | - |
| 52 | -37908.63945 | 65.974  | 0      | - | 0      | - | 0.0101 | - | 0      | - | 0.0015 | - | 1.71e-08 | - | 2.75e-56 | - |
| 53 | -37854.33302 | 11.668  | 0.0104 | + | 0.12   | + | 0.922  | + | 0.0886 | + | 0.744  | + | 0.0103   | + | 0.149    | + |
| 54 | -37899.48908 | 56.824  | 0      | - | 0.0005 | - | 0.0194 | - | 0.0001 | - | 0.0048 | - | 7.34e-10 | - | 0.00197  | - |
| 55 | -37882.94    | 40.275  | 0.0004 | - | 0.0038 | - | 0.144  | + | 0.0028 | - | 0.0463 | - | 0.00036  | - | 0.00518  | - |
| 56 | -37852.44285 | 9.7775  | 0.0057 | + | 0.149  | + | 0.961  | + | 0.11   | + | 0.864  | + | 0.00607  | + | 0.196    | + |
| 57 | -37867.11717 | 24.452  | 0      | - | 0.006  | - | 0.52   | + | 0.006  | - | 0.116  | + | 1.59e-05 | - | 0.0227   | - |
| 58 | -37867.83364 | 25.168  | 0.0002 | - | 0.0047 | - | 0.495  | + | 0.005  | - | 0.0834 | + | 0.000298 | - | 0.0015   | - |
| 59 | -37848.23903 | 5.5737  | 0.0047 | + | 0.111  | + | 0.998  | + | 0.111  | + | 0.941  | + | 0.00457  | + | 0.298    | + |
| 60 | -37851.82695 | 9.1616  | 0.0116 | + | 0.144  | + | 0.97   | + | 0.104  | + | 0.845  | + | 0.0108   | + | 0.216    | + |
| 61 | -37866.86468 | 24.199  | 0.0003 | - | 0.0057 | - | 0.529  | + | 0.0056 | - | 0.0781 | + | 0.000286 | - | 0.00612  | - |
| 62 | -37847.66533 | 5       | 0.0083 | + | 0.187  | + | 0.997  | + | 0.187  | + | 0.976  | + | 0.0092   | + | 0.371    | + |
| 63 | -37851.27888 | 8.6136  | 0.0127 | + | 0.138  | + | 0.945  | + | 0.105  | + | 0.777  | + | 0.0117   | + | 0.165    | + |
| 64 | -37850.07545 | 7.4101  | 0.008  | + | 0.073  | + | 0.972  | + | 0.073  | + | 0.731  | + | 0.00731  | + | 0.266    | + |
| 65 | -37850.15267 | 7.4874  | 0.0063 | + | 0.0547 | + | 0.982  | + | 0.0546 | + | 0.697  | + | 0.00535  | + | 0.16     | + |
| 66 | -37844.77839 | 2.1131  | 0.0188 | + | 0.173  | + | 0.999  | + | 0.173  | + | 0.974  | + | 0.0171   | + | 0.525    | + |
| 67 | -37848.94303 | 6.2777  | 0.0069 | + | 0.085  | + | 0.987  | + | 0.0847 | + | 0.806  | + | 0.00869  | + | 0.315    | + |
| 68 | -37857.01343 | 14.348  | 0      | - | 0.0109 | - | 0.864  | + | 0.0109 | - | 0.218  | + | 0.000157 | - | 0.0157   | - |
| 69 | -37854.24657 | 11.581  | 0.0037 | - | 0.0904 | + | 0.92   | + | 0.0398 | - | 0.536  | + | 0.00397  | + | 0.131    | + |
| 70 | -37849.49762 | 6.8323  | 0.0024 | - | 0.0492 | - | 0.98   | + | 0.0487 | - | 0.639  | + | 0.00424  | + | 0.215    | + |
| 71 | -37861.33206 | 18.667  | 0.0001 | - | 0.007  | - | 0.721  | + | 0.007  | - | 0.147  | + | 0.000105 | - | 0.0141   | - |
| 72 | -37847.09595 | 4.4306  | 0.0318 | + | 0.209  | + | 0.995  | + | 0.209  | + | 0.973  | + | 0.0281   | + | 0.454    | + |
| 73 | -37845.59717 | 2.9318  | 0.0531 | + | 0.36   | + | 0.999  | + | 0.361  | + | 0.999  | + | 0.0476   | + | 0.609    | + |
| 74 | -37849.54158 | 6.8763  | 0.0042 | + | 0.178  | + | 0.991  | + | 0.12   | + | 0.915  | + | 0.00466  | + | 0.192    | + |
| 75 | -37859.90195 | 17.237  | 0.0015 | - | 0.0155 | - | 0.752  | + | 0.0154 | - | 0.241  | + | 0.00114  | - | 0.0229   | - |
| 76 | -37856.5128  | 13.847  | 0.005  | + | 0.0381 | - | 0.856  | + | 0.0381 | - | 0.443  | + | 0.00381  | + | 0.0768   | + |
| 77 | -37847.21163 | 4.5463  | 0.0184 | + | 0.264  | + | 0.996  | + | 0.202  | + | 0.976  | + | 0.0183   | + | 0.369    | + |
| 78 | -37848.55732 | 5.892   | 0.0077 | + | 0.166  | + | 0.994  | + | 0.166  | + | 0.961  | + | 0.008    | + | 0.239    | + |
| 79 | -37847.28285 | 4.6175  | 0.0186 | + | 0.128  | + | 0.996  | + | 0.128  | + | 0.922  | + | 0.0147   | + | 0.387    | + |
| 80 | -37847.06166 | 4.3963  | 0.0222 | + | 0.288  | + | 0.997  | + | 0.169  | + | 0.964  | + | 0.023    | + | 0.416    | + |
| 81 | -37861.33388 | 18.669  | 0.0012 | - | 0.0252 | - | 0.7    | + | 0.0248 | - | 0.319  | + | 0.00126  | - | 0.0443   | - |
| 82 | -37869.08473 | 26.419  | 0.0004 | - | 0.0135 | - | 0.467  | + | 0.0064 | - | 0.0786 | + | 0.000459 | - | 0.00424  | - |
| 83 | -37858.76674 | 16.101  | 0.0017 | - | 0.0238 | - | 0.808  | + | 0.0238 | - | 0.32   | + | 0.00142  | - | 0.031    | - |
| 84 | -37843.49746 | 0.83214 | 0.0679 | + | 0.393  | + | 1      | + | 0.393  | + | 1      | + | 0.0527   | + | 0.844    | + |
| 85 | -37843.78173 | 1.1164  | 0.0331 | + | 0.398  | + | 1      | + | 0.399  | + | 1      | + | 0.0319   | + | 0.717    | + |
| 86 | -37851.06017 | 8.3949  | 0.0104 | + | 0.157  | + | 0.976  | + | 0.0981 | + | 0.841  | + | 0.0103   | + | 0.213    | + |
| 87 | -37871.52903 | 28.864  | 0.0001 | - | 0.0016 | - | 0.397  | + | 0.0016 | - | 0.0219 | - | 4.94e-05 | - | 1.11e-05 | - |
| 88 | -37859.61912 | 16.954  | 0.0012 | - | 0.0204 | - | 0.772  | + | 0.0204 | - | 0.285  | + | 0.00108  | - | 0.0265   | - |
| 89 | -37873.35649 | 30.691  | 0      | - | 0.0014 | - | 0.334  | + | 0.0014 | - | 0.0152 | - | 4.66e-07 | - | 0.00401  | - |
| 90 | -37848.07919 | 5.4139  | 0.0295 | + | 0.174  | + | 0.994  | + | 0.145  | + | 0.912  | + | 0.0258   | + | 0.365    | + |
| 91 | -37842.66548 | 0.00017 | 0.017  | + | 0.503  | + | 1      | + | 0.503  | + | 1      | + | 0.0267   | + | 0.966    | + |
| 92 | -37860.51987 | 17.855  | 0      | - | 0.019  | - | 0.746  | + | 0.0151 | - | 0.237  | + | 0.000105 | - | 0.0172   | - |

|     |              |         |        |   |        |   |       |   |        |   |        |   |          |   |         |   |
|-----|--------------|---------|--------|---|--------|---|-------|---|--------|---|--------|---|----------|---|---------|---|
| 93  | -37868.03142 | 25.366  | 0.0002 | - | 0.0104 | - | 0.495 | + | 0.01   | - | 0.141  | + | 0.000282 | - | 0.00587 | - |
| 94  | -37849.08368 | 6.4184  | 0.0013 | - | 0.158  | + | 0.993 | + | 0.124  | + | 0.924  | + | 0.00245  | - | 0.187   | + |
| 95  | -37847.06358 | 4.3983  | 0.0467 | + | 0.252  | + | 0.988 | + | 0.227  | + | 0.967  | + | 0.0403   | + | 0.495   | + |
| 96  | -37845.78403 | 3.1187  | 0.0582 | + | 0.35   | + | 0.999 | + | 0.35   | + | 0.998  | + | 0.0507   | + | 0.639   | + |
| 97  | -37855.42428 | 12.759  | 0.0006 | - | 0.0194 | - | 0.879 | + | 0.0194 | - | 0.315  | + | 0.000693 | - | 0.022   | - |
| 98  | -37860.66763 | 18.002  | 0.0009 | - | 0.0114 | - | 0.735 | + | 0.0116 | - | 0.201  | + | 0.000956 | - | 0.0139  | - |
| 99  | -37848.92495 | 6.2596  | 0.0046 | + | 0.0886 | + | 0.987 | + | 0.0884 | + | 0.806  | + | 0.00504  | + | 0.192   | + |
| 100 | -37860.50057 | 17.835  | 0.0005 | - | 0.0309 | - | 0.745 | + | 0.011  | - | 0.199  | + | 0.000619 | - | 0.0225  | - |
| 101 | -37853.77201 | 11.107  | 0.0028 | - | 0.0343 | - | 0.912 | + | 0.0342 | - | 0.508  | + | 0.00248  | - | 0.148   | + |
| 102 | -37848.88683 | 6.2215  | 0.0154 | + | 0.16   | + | 0.99  | + | 0.159  | + | 0.94   | + | 0.0143   | + | 0.367   | + |
| 103 | -37855.13821 | 12.473  | 0.0013 | - | 0.0343 | - | 0.911 | + | 0.032  | - | 0.473  | + | 0.0011   | - | 0.0925  | + |
| 104 | -37860.97921 | 18.314  | 0.0024 | - | 0.0333 | - | 0.71  | + | 0.0283 | - | 0.31   | + | 0.00235  | - | 0.0425  | - |
| 105 | -37855.71804 | 13.053  | 0.0011 | - | 0.0679 | + | 0.895 | + | 0.0217 | - | 0.368  | + | 0.000926 | - | 0.056   | + |
| 106 | -37866.71138 | 24.046  | 0      | - | 0.0024 | - | 0.526 | + | 0.0024 | - | 0.0409 | - | 3.57e-05 | - | 0.021   | - |
| 107 | -37848.94304 | 6.2777  | 0.0102 | + | 0.0849 | + | 0.988 | + | 0.085  | + | 0.801  | + | 0.00876  | + | 0.311   | + |
| 108 | -37858.75099 | 16.086  | 0.0018 | - | 0.0624 | + | 0.778 | + | 0.0172 | - | 0.229  | + | 0.00171  | - | 0.0121  | - |
| 109 | -37848.76713 | 6.1018  | 0.0009 | - | 0.0758 | + | 0.991 | + | 0.076  | + | 0.79   | + | 0.00172  | - | 0.196   | + |
| 110 | -37849.49108 | 6.8258  | 0.0151 | + | 0.12   | + | 0.99  | + | 0.12   | + | 0.895  | + | 0.0132   | + | 0.288   | + |
| 111 | -37849.49793 | 6.8326  | 0.0041 | + | 0.0488 | - | 0.98  | + | 0.0486 | - | 0.639  | + | 0.00424  | + | 0.226   | + |
| 112 | -37852.46046 | 9.7951  | 0.0051 | + | 0.0944 | + | 0.917 | + | 0.0715 | + | 0.629  | + | 0.00542  | + | 0.0999  | + |
| 113 | -37857.5369  | 14.872  | 0.0032 | - | 0.0409 | - | 0.81  | + | 0.0321 | - | 0.353  | + | 0.0032   | - | 0.153   | + |
| 114 | -37845.31729 | 2.652   | 0.0206 | + | 0.258  | + | 0.999 | + | 0.258  | + | 0.994  | + | 0.0186   | + | 0.512   | + |
| 115 | -37844.2378  | 1.5725  | 0.0285 | + | 0.241  | + | 1     | + | 0.241  | + | 0.994  | + | 0.023    | + | 0.614   | + |
| 116 | -37853.32651 | 10.661  | 0.0004 | - | 0.0231 | - | 0.929 | + | 0.0231 | - | 0.39   | + | 0.00113  | - | 0.108   | + |
| 117 | -37858.28118 | 15.616  | 0.0011 | - | 0.0331 | - | 0.768 | + | 0.033  | - | 0.367  | + | 0.00121  | - | 0.0684  | + |
| 118 | -37844.59408 | 1.9288  | 0.0353 | + | 0.302  | + | 1     | + | 0.302  | + | 0.998  | + | 0.0296   | + | 0.671   | + |
| 119 | -37853.43195 | 10.767  | 0.0185 | + | 0.103  | + | 0.923 | + | 0.0769 | + | 0.665  | + | 0.0158   | + | 0.146   | + |
| 120 | -37843.07719 | 0.41187 | 0.0136 | + | 0.324  | + | 1     | + | 0.324  | + | 1      | + | 0.0196   | + | 0.714   | + |
| 121 | -37873.53022 | 30.865  | 0.0006 | - | 0.0047 | - | 0.347 | + | 0.0037 | - | 0.0472 | - | 0.000463 | - | 0.00655 | - |
| 122 | -37856.66361 | 13.998  | 0.0027 | - | 0.0582 | + | 0.857 | + | 0.0381 | - | 0.441  | + | 0.00306  | - | 0.0517  | + |
| 123 | -37865.25565 | 22.59   | 0.0001 | - | 0.0027 | - | 0.572 | + | 0.0027 | - | 0.0409 | - | 0.000153 | - | 0.00496 | - |

## 2. C-terminal pentapeptides and beta-propeller clade (#10 on Figure 2) -- ciliate transfer from bacteria

### TABLE SUMMARY

0/33 trees passing all tests violate proposed HGT

Consensus tree of trees passing all tests (newick format, UFBootstrap values provided):

```
(ETO09075.1_ciliateR_N_Ps_BPs,ETO29051.1__ciliateR_N_Ps_BPs,(((WP_052394068.1__ciliateb_N_Ps_BPs,WP_051213
716.1_ciliateb_N_Ps_BPs)
100,(KAG0013349.1__ciliate_N_Ps_BPs,(KAF9117723.1__ciliate_N_Ps_BPs,OAQ28202.1__ciliate_N_Ps_BPs)100)97)
88,((XP_001446711.1_ciliate_N_Ps_BPs,XP_001432032.1_ciliate_N_Ps_BPs)
100,(((KYF61481.1_PNPase_REase_i_N_Ps_BPs,(WP_030490998.1_Trypsin_Calci_REase_i_N_Ps_BPs,WP_044888278
.1_TIR_Calci_REase_i_N_Ps_BPs)88)100,WP_011318970.1_CASPASE_REase_i_N_Ps_BPs)58,((WP_008079381.1__a-
hX3_N_Ps,((WP_085052565.1_a-hX3_N_Ps,(NES99197.1_a-hX3_N_Ps,WP_051210891.1_a-hX3_N_Ps)91)
100,(RVU85773.1_a-hX3_N_Ps,WP_108194693.1_a-hX3_N_Ps)94)70)100,((OII57448.1_TM_TM_N__TMs_Cterm-
tail,(MSQ47516.1_TM_TM_N__TMs_Cterm-tail,WP_135201481.1_TM_TM_N__TMs_Cterm-tail)94)
88,(NEQ67966.1__TM_TM_N__TMs_Cterm-tail,WP_015393189.1__TM_TM_N__TMs_Cterm-tail)82)100)45)100)64)100);
```

| Tree | logL         | deltaL   | bp-RELL | p-KH     | p-SH     | p-WKH    | p-WSH    | c-ELW    | p-AU     |
|------|--------------|----------|---------|----------|----------|----------|----------|----------|----------|
| 1    | -24181.04336 | 3.17e-05 | 0.0179  | + 0.496  | + 1      | + 0.496  | + 1      | 0.038    | 0.927    |
| 2    | -24186.20951 | 5.1662   | 0.0578  | + 0.238  | + 0.979  | + 0.224  | + 0.94   | 0.0516   | 0.402    |
| 3    | -24183.82012 | 2.7768   | 0.0269  | + 0.243  | + 0.997  | + 0.24   | + 0.985  | 0.0309   | 0.475    |
| 4    | -24262.24572 | 81.202   | 0       | - 0      | - 0.0004 | - 0      | - 0      | 2.95e-21 | 1.17e-63 |
| 5    | -24201.69304 | 20.65    | 0       | - 0.0124 | - 0.542  | + 0.0124 | - 0.151  | 4.92e-05 | 0.00637  |
| 6    | -24208.23649 | 27.193   | 0       | - 0.0024 | - 0.322  | + 0.0024 | - 0.0225 | 4.63e-05 | 0.00215  |
| 7    | -24205.2476  | 24.204   | 0.0006  | - 0.0086 | - 0.414  | + 0.0083 | - 0.107  | 0.000479 | 0.00425  |
| 8    | -24198.98704 | 17.944   | 0.0046  | - 0.0356 | - 0.605  | + 0.0355 | - 0.311  | 0.0048   | 0.0508   |
| 9    | -24189.50082 | 8.4575   | 0.0009  | - 0.0847 | + 0.959  | + 0.0846 | + 0.769  | 0.00177  | 0.114    |
| 10   | -24203.32459 | 22.281   | 0.0003  | - 0.0069 | - 0.473  | + 0.0069 | - 0.0741 | 0.000228 | 0.00345  |
| 11   | -24189.47982 | 8.4365   | 0.0048  | - 0.11   | + 0.951  | + 0.0519 | + 0.565  | 0.00571  | 0.152    |
| 12   | -24182.4095  | 1.3662   | 0.0904  | + 0.382  | + 1      | + 0.382  | + 1      | 0.0737   | 0.837    |
| 13   | -24251.5826  | 70.539   | 0       | - 0      | - 0.0037 | - 0      | - 0      | 1.04e-12 | 0.000422 |
| 14   | -24216.51479 | 35.471   | 0       | - 0.0012 | - 0.167  | + 0.0006 | - 0.0162 | 1.22e-05 | 0.00252  |
| 15   | -24199.94575 | 18.902   | 0.0027  | - 0.0223 | - 0.572  | + 0.0223 | - 0.223  | 0.00275  | 0.038    |
| 16   | -24183.76427 | 2.7209   | 0.0073  | + 0.178  | + 0.999  | + 0.178  | + 0.976  | 0.0154   | 0.391    |
| 17   | -24187.17233 | 6.129    | 0       | - 0.0887 | + 0.993  | + 0.0795 | + 0.833  | 0.000578 | 0.225    |
| 18   | -24204.03248 | 22.989   | 0.0004  | - 0.0052 | - 0.427  | + 0.0052 | - 0.0705 | 0.00026  | 0.0294   |
| 19   | -24193.35994 | 12.317   | 0.0075  | + 0.0751 | + 0.828  | + 0.0529 | + 0.457  | 0.00711  | 0.0745   |
| 20   | -24355.04298 | 174      | 0       | - 0      | - 0      | - 0      | - 0      | 1.15e-45 | 2.82e-82 |
| 21   | -24187.08784 | 6.0445   | 0.0206  | + 0.182  | + 0.983  | + 0.138  | + 0.885  | 0.0189   | 0.34     |
| 22   | -24183.45184 | 2.4085   | 0.0029  | - 0.182  | + 1      | + 0.182  | + 0.991  | 0.00768  | 0.44     |
| 23   | -24181.17184 | 0.12851  | 0.0943  | + 0.478  | + 1      | + 0.479  | + 1      | 0.0748   | 0.879    |
| 24   | -24205.19119 | 24.148   | 0.0017  | - 0.0118 | - 0.428  | + 0.0118 | - 0.111  | 0.00151  | 0.0169   |
| 25   | -24278.72831 | 97.685   | 0       | - 0      | - 0.0002 | - 0      | - 0      | 1.83e-20 | 8.24e-40 |
| 26   | -24185.30437 | 4.261    | 0.011   | + 0.0872 | + 0.997  | + 0.0871 | + 0.824  | 0.0121   | 0.315    |
| 27   | -24241.71568 | 60.672   | 0       | - 0      | - 0.0148 | - 0      | - 0.0002 | 7.19e-13 | 9.65e-05 |
| 28   | -24186.82002 | 5.7767   | 0.0222  | + 0.188  | + 0.975  | + 0.159  | + 0.886  | 0.0223   | 0.325    |
| 29   | -24183.22435 | 2.181    | 0.0257  | + 0.266  | + 0.999  | + 0.266  | + 0.994  | 0.0254   | 0.496    |
| 30   | -24199.82552 | 18.782   | 0.0014  | - 0.0196 | - 0.571  | + 0.0093 | - 0.109  | 0.00119  | 0.0128   |
| 31   | -24186.89782 | 5.8545   | 0.0397  | + 0.166  | + 0.976  | + 0.166  | + 0.919  | 0.034    | 0.49     |
| 32   | -24182.6977  | 1.6544   | 0.0783  | + 0.313  | + 0.999  | + 0.313  | + 0.997  | 0.062    | 0.663    |
| 33   | -24208.23646 | 27.193   | 0.0001  | - 0.0024 | - 0.323  | + 0.0024 | - 0.0216 | 4.72e-05 | 0.00261  |
| 34   | -24181.04332 | 0        | 0.0287  | + 0.504  | + 1      | + 0.504  | + 1      | 0.0381   | 0.926    |
| 35   | -24204.14814 | 23.105   | 0.0027  | - 0.0186 | - 0.458  | + 0.0167 | - 0.165  | 0.00233  | 0.0362   |
| 36   | -24187.16036 | 6.117    | 0.0676  | + 0.2    | + 0.967  | + 0.19   | + 0.898  | 0.0575   | 0.361    |
| 37   | -24191.90207 | 10.859   | 0.0005  | - 0.0364 | - 0.895  | + 0.0362 | - 0.419  | 0.00117  | 0.109    |
| 38   | -24200.03721 | 18.994   | 0.0006  | - 0.0037 | - 0.583  | + 0.0037 | - 0.0506 | 0.000436 | 0.0135   |
| 39   | -24183.76444 | 2.7211   | 0.009   | + 0.176  | + 0.999  | + 0.176  | + 0.981  | 0.015    | 0.409    |
| 40   | -24189.93939 | 8.8961   | 0.0209  | + 0.118  | + 0.902  | + 0.118  | + 0.759  | 0.0196   | 0.229    |
| 41   | -24205.62944 | 24.586   | 0.0005  | - 0.0166 | - 0.4    | + 0.0152 | - 0.13   | 0.000666 | 0.0154   |
| 42   | -24194.80814 | 13.765   | 0.0134  | + 0.0789 | + 0.746  | + 0.0709 | + 0.524  | 0.0124   | 0.11     |
| 43   | -24186.03344 | 4.9901   | 0.0104  | + 0.0864 | + 0.991  | + 0.0924 | + 0.8    | 0.0111   | 0.25     |
| 44   | -24188.06954 | 7.0262   | 0.0048  | - 0.132  | + 0.971  | + 0.132  | + 0.876  | 0.00607  | 0.192    |
| 45   | -24186.90357 | 5.8602   | 0.009   | + 0.174  | + 0.982  | + 0.104  | + 0.828  | 0.0115   | 0.254    |

|    |              |         |        |   |        |   |       |   |        |   |        |   |          |   |          |   |
|----|--------------|---------|--------|---|--------|---|-------|---|--------|---|--------|---|----------|---|----------|---|
| 46 | -24193.05334 | 12.01   | 0.0015 | - | 0.0287 | - | 0.819 | + | 0.0287 | - | 0.339  | + | 0.00163  | - | 0.0695   | + |
| 47 | -24208.23688 | 27.194  | 0      | - | 0.0024 | - | 0.322 | + | 0.0024 | - | 0.0227 | - | 4.6e-05  | - | 0.00315  | - |
| 48 | -24183.45165 | 2.4083  | 0.0022 | - | 0.182  | + | 1     | + | 0.182  | + | 0.99   | + | 0.00769  | + | 0.372    | + |
| 49 | -24193.15476 | 12.111  | 0.0021 | - | 0.0207 | - | 0.835 | + | 0.0209 | - | 0.263  | + | 0.00192  | - | 0.0479   | - |
| 50 | -24211.90007 | 30.857  | 0      | - | 0.0018 | - | 0.239 | + | 0.0008 | - | 0.009  | - | 2.38e-05 | - | 0.000166 | - |
| 51 | -24184.9888  | 3.9455  | 0.0036 | - | 0.184  | + | 0.998 | + | 0.159  | + | 0.966  | + | 0.00637  | + | 0.258    | + |
| 52 | -24195.75547 | 14.712  | 0.002  | - | 0.035  | - | 0.746 | + | 0.0238 | - | 0.244  | + | 0.00249  | - | 0.0483   | - |
| 53 | -24190.79618 | 9.7529  | 0.0055 | + | 0.0496 | - | 0.92  | + | 0.0495 | - | 0.528  | + | 0.00494  | - | 0.141    | + |
| 54 | -24192.79203 | 11.749  | 0.0289 | + | 0.115  | + | 0.784 | + | 0.101  | + | 0.622  | + | 0.0258   | + | 0.168    | + |
| 55 | -24190.58846 | 9.5451  | 0.0422 | + | 0.117  | + | 0.856 | + | 0.113  | + | 0.679  | + | 0.0356   | + | 0.269    | + |
| 56 | -24183.08876 | 2.0454  | 0.0089 | + | 0.236  | + | 1     | + | 0.236  | + | 0.995  | + | 0.0133   | + | 0.586    | + |
| 57 | -24207.61634 | 26.573  | 0      | - | 0.0051 | - | 0.321 | + | 0.0028 | - | 0.0376 | - | 1.67e-05 | - | 0.00322  | - |
| 58 | -24213.93021 | 32.887  | 0      | - | 0.0004 | - | 0.209 | + | 0.0004 | - | 0.0038 | - | 8.57e-06 | - | 1.2e-09  | - |
| 59 | -24181.86787 | 0.82454 | 0.009  | + | 0.268  | + | 1     | + | 0.267  | + | 0.999  | + | 0.0195   | + | 0.724    | + |
| 60 | -24204.61528 | 23.572  | 0.0006 | - | 0.0069 | - | 0.43  | + | 0.0045 | - | 0.0425 | - | 0.000556 | - | 0.011    | - |
| 61 | -24187.39051 | 6.3472  | 0.018  | + | 0.173  | + | 0.975 | + | 0.169  | + | 0.903  | + | 0.0176   | + | 0.256    | + |
| 62 | -24207.75589 | 26.713  | 0.0001 | - | 0.0017 | - | 0.337 | + | 0.0027 | - | 0.0217 | - | 3.78e-05 | - | 0.000233 | - |
| 63 | -24198.5062  | 17.463  | 0.0064 | + | 0.032  | - | 0.625 | + | 0.032  | - | 0.326  | + | 0.00586  | + | 0.0625   | + |
| 64 | -24182.19117 | 1.1478  | 0.0409 | + | 0.32   | + | 1     | + | 0.319  | + | 0.999  | + | 0.0364   | + | 0.75     | + |
| 65 | -24183.92687 | 2.8835  | 0.0088 | + | 0.204  | + | 0.999 | + | 0.143  | + | 0.954  | + | 0.0118   | + | 0.332    | + |
| 66 | -24200.01069 | 18.967  | 0.0003 | - | 0.0089 | - | 0.591 | + | 0.0092 | - | 0.11   | + | 0.000271 | - | 0.0138   | - |
| 67 | -24204.04409 | 23.001  | 0.0002 | - | 0.0059 | - | 0.435 | + | 0.0065 | - | 0.064  | + | 0.000139 | - | 0.01     | - |
| 68 | -24183.17182 | 2.1285  | 0.01   | + | 0.234  | + | 1     | + | 0.233  | + | 0.994  | + | 0.0149   | + | 0.585    | + |
| 69 | -24181.86797 | 0.82465 | 0.012  | + | 0.268  | + | 1     | + | 0.268  | + | 0.999  | + | 0.0195   | + | 0.77     | + |
| 70 | -24200.68481 | 19.641  | 0      | - | 0.0027 | - | 0.562 | + | 0.0027 | - | 0.0444 | - | 0.000216 | - | 0.0105   | - |
| 71 | -24188.73272 | 7.6894  | 0.0015 | - | 0.104  | - | 0.972 | + | 0.0936 | + | 0.798  | + | 0.00265  | - | 0.267    | + |
| 72 | -24202.75671 | 21.713  | 0.0001 | - | 0.0105 | - | 0.495 | + | 0.0079 | - | 0.075  | + | 0.00039  | - | 0.0101   | - |
| 73 | -24183.67049 | 2.6272  | 0.0335 | + | 0.283  | + | 0.998 | + | 0.258  | + | 0.992  | + | 0.0303   | + | 0.558    | + |
| 74 | -24192.56251 | 11.519  | 0.0072 | + | 0.0556 | + | 0.867 | + | 0.044  | - | 0.474  | + | 0.0063   | + | 0.123    | + |
| 75 | -24183.94647 | 2.9031  | 0.0257 | + | 0.27   | + | 0.998 | + | 0.249  | + | 0.99   | + | 0.0241   | + | 0.548    | + |
| 76 | -24206.89145 | 25.848  | 0.0001 | - | 0.0048 | - | 0.365 | + | 0.0038 | - | 0.053  | + | 8.19e-05 | - | 0.00981  | - |
| 77 | -24186.29724 | 5.2539  | 0.0212 | + | 0.139  | + | 0.991 | + | 0.139  | + | 0.908  | + | 0.0182   | + | 0.325    | + |
| 78 | -24183.96798 | 2.9247  | 0.0118 | + | 0.196  | + | 0.999 | + | 0.196  | + | 0.978  | + | 0.0138   | + | 0.43     | + |
| 79 | -24193.38685 | 12.344  | 0.0049 | + | 0.0257 | - | 0.818 | + | 0.0258 | - | 0.272  | + | 0.00367  | - | 0.0521   | + |
| 80 | -24197.76667 | 16.723  | 0.0019 | - | 0.028  | - | 0.693 | + | 0.0241 | - | 0.268  | + | 0.00162  | - | 0.0251   | - |
| 81 | -24184.82574 | 3.7824  | 0.0008 | - | 0.153  | + | 0.999 | + | 0.153  | + | 0.971  | + | 0.00321  | - | 0.169    | + |

### 3. Ancient archaeo-eukaryotic clade (#19, Figure 2) -- transfer from archaea to Kipferlia diplomonad

#### TABLE SUMMARY

0/40 trees passing all tests violate proposed transfer

Consensus tree of trees passing all tests (newick format, UFBootstrap values provided):

```
(GCA61984.1 Kbia ancient,(GIQ85004.1 Kbia ancient,GIQ86837.1 Kbia ancient)
93,(((MCD6484933.1 Odin ancient N FHA,UCE10343.1 Thor ancient N HEATs)55,MBD3349954.1 Loki ancient)
53,(WP 167424763.1 N TPRs REase,((PYT57412.1 N TPRs REase,((KYF62697.1 N TPRs_PNPase,OGV08813.1 N T
PRs REase)73,(WP 013718337.1 N TPRs REase,OQZ04106.1 N TPRs REase)70)45)
88,(MBS82255.1 N GT4,WP_069042340.1 N GT4)75)100)100)95);
```

| Tree | logL         | deltaL  | bp-RELL  | p-KH     | p-SH     | p-WKH    | p-WSH    | c-ELW      | p-AU       |
|------|--------------|---------|----------|----------|----------|----------|----------|------------|------------|
| 1    | -12784.21843 | 0       | 0.0053 + | 0.491 +  | 1 +      | 0.507 +  | 1 +      | 0.0395 +   | 0.921 +    |
| 2    | -12786.94517 | 2.7267  | 0.0047 - | 0.188 +  | 0.998 +  | 0.188 +  | 0.977 +  | 0.0101 +   | 0.566 +    |
| 3    | -12803.88756 | 19.669  | 0.0006 - | 0.0273 - | 0.361 +  | 0.0165 - | 0.237 +  | 0.000515 - | 0.044 -    |
| 4    | -12803.40371 | 19.185  | 0.0008 - | 0.0162 - | 0.401 +  | 0.0162 - | 0.195 +  | 0.000655 - | 0.0241 -   |
| 5    | -12786.63166 | 2.4132  | 0.0157 + | 0.252 +  | 0.992 +  | 0.252 +  | 0.979 +  | 0.0255 +   | 0.569 +    |
| 6    | -12791.09177 | 6.8733  | 0.0068 + | 0.195 +  | 0.941 +  | 0.102 +  | 0.797 +  | 0.00725 +  | 0.262 +    |
| 7    | -12795.94777 | 11.729  | 0.0003 - | 0.0706 + | 0.752 +  | 0.0241 - | 0.348 +  | 0.000735 - | 0.112 +    |
| 8    | -12794.36888 | 10.15   | 0.0057 + | 0.119 +  | 0.817 +  | 0.0901 + | 0.711 +  | 0.00482 +  | 0.135 +    |
| 9    | -12798.47122 | 14.253  | 0.0008 - | 0.051 +  | 0.633 +  | 0.0448 - | 0.491 +  | 0.000956 - | 0.0419 -   |
| 10   | -12792.61908 | 8.4006  | 0.0003 - | 0.115 +  | 0.873 +  | 0.0315 - | 0.413 +  | 0.00222 -  | 0.0876 +   |
| 11   | -12786.84583 | 2.6274  | 0.0436 + | 0.145 +  | 0.987 +  | 0.143 +  | 0.839 +  | 0.0315 +   | 0.395 +    |
| 12   | -12791.84164 | 7.6232  | 0.005 +  | 0.165 +  | 0.907 +  | 0.0773 + | 0.673 +  | 0.0052 +   | 0.161 +    |
| 13   | -12800.43035 | 16.212  | 0.002 -  | 0.0435 - | 0.532 +  | 0.0243 - | 0.32 +   | 0.002 -    | 0.042 -    |
| 14   | -12802.36236 | 18.144  | 0.0003 - | 0.0131 - | 0.432 +  | 0.013 -  | 0.193 +  | 0.000392 - | 0.053 +    |
| 15   | -12794.64221 | 10.424  | 0.0009 - | 0.0906 + | 0.774 +  | 0.0241 - | 0.337 +  | 0.00178 -  | 0.114 +    |
| 16   | -12841.71886 | 57.5    | 0 -      | 0 -      | 0.0032 - | 0 -      | 0 -      | 1.03e-07 - | 8.56e-06 - |
| 17   | -12805.35665 | 21.138  | 0 -      | 0.0251 - | 0.325 +  | 0.0083 - | 0.132 +  | 5.17e-05 - | 0.00412 -  |
| 18   | -12804.66904 | 20.451  | 0.0002 - | 0.0237 - | 0.342 +  | 0.0147 - | 0.218 +  | 0.00026 -  | 0.024 -    |
| 19   | -12813.96923 | 29.751  | 0 -      | 0.0008 - | 0.124 +  | 0.0008 - | 0.0066 - | 1.57e-05 - | 0.00117 -  |
| 20   | -12794.36321 | 10.145  | 0.0124 + | 0.149 +  | 0.798 +  | 0.102 +  | 0.712 +  | 0.0114 +   | 0.191 +    |
| 21   | -12801.9468  | 17.728  | 0.0001 - | 0.0322 - | 0.454 +  | 0.0238 - | 0.323 +  | 0.000307 - | 0.0058 -   |
| 22   | -12814.92132 | 30.703  | 0 -      | 0.0012 - | 0.113 +  | 0.0016 - | 0.0263 - | 1.99e-05 - | 0.000566 - |
| 23   | -12788.53353 | 4.3151  | 0.0314 + | 0.231 +  | 0.976 +  | 0.231 +  | 0.969 +  | 0.0311 +   | 0.611 +    |
| 24   | -12816.90969 | 32.691  | 0 -      | 0.0026 - | 0.0851 + | 0.0005 - | 0.0083 - | 8.45e-07 - | 0.00208 -  |
| 25   | -12809.57234 | 25.354  | 0.0004 - | 0.0076 - | 0.209 +  | 0.0038 - | 0.0507 + | 0.000265 - | 0.00109 -  |
| 26   | -12838.89299 | 54.675  | 0 -      | 0.0001 - | 0.0039 - | 0.0001 - | 0.0011 - | 4.78e-11 - | 0.0012 -   |
| 27   | -12797.89338 | 13.675  | 0.0001 - | 0.0121 - | 0.662 +  | 0.0121 - | 0.197 +  | 0.000269 - | 0.0389 -   |
| 28   | -12814.4733  | 30.255  | 0 -      | 0.0009 - | 0.122 +  | 0.0009 - | 0.0111 - | 1.64e-05 - | 0.00147 -  |
| 29   | -12789.11106 | 4.8926  | 0.0012 - | 0.248 +  | 0.984 +  | 0.144 +  | 0.918 +  | 0.00556 +  | 0.23 +     |
| 30   | -12786.45705 | 2.2386  | 0.0275 + | 0.194 +  | 0.996 +  | 0.195 +  | 0.956 +  | 0.0224 +   | 0.49 +     |
| 31   | -12786.49594 | 2.2775  | 0.0055 + | 0.301 +  | 0.998 +  | 0.26 +   | 0.991 +  | 0.00946 +  | 0.367 +    |
| 32   | -12784.21865 | 0.00022 | 0.0199 + | 0.498 +  | 1 +      | 0.498 +  | 1 +      | 0.0397 +   | 0.923 +    |
| 33   | -12796.0416  | 11.823  | 0.0066 + | 0.0795 + | 0.73 +   | 0.0757 + | 0.549 +  | 0.00625 +  | 0.124 +    |
| 34   | -12805.53194 | 21.314  | 0.0001 - | 0.0075 - | 0.309 +  | 0.0029 - | 0.0632 + | 9.24e-05 - | 0.00125 -  |
| 35   | -12785.5419  | 1.3235  | 0.132 +  | 0.417 +  | 0.995 +  | 0.41 +   | 0.994 +  | 0.103 +    | 0.661 +    |
| 36   | -12792.11273 | 7.8943  | 0.0065 + | 0.0891 + | 0.921 +  | 0.0886 + | 0.734 +  | 0.00578 +  | 0.186 +    |
| 37   | -12820.79787 | 36.579  | 0 -      | 0.0018 - | 0.047 -  | 0.0007 - | 0.0079 - | 1.81e-06 - | 0.00035 -  |
| 38   | -12795.31265 | 11.094  | 0.0001 - | 0.0491 - | 0.771 +  | 0.0363 - | 0.42 +   | 0.000305 - | 0.0196 -   |
| 39   | -12784.7963  | 0.57787 | 0.0483 + | 0.457 +  | 1 +      | 0.457 +  | 1 +      | 0.0481 +   | 0.839 +    |
| 40   | -12795.89976 | 11.681  | 0.0025 - | 0.0262 - | 0.754 +  | 0.0261 - | 0.336 +  | 0.00241 -  | 0.054 +    |
| 41   | -12798.14195 | 13.924  | 0.0013 - | 0.0673 + | 0.633 +  | 0.0295 - | 0.355 +  | 0.00123 -  | 0.0417 -   |
| 42   | -12787.57204 | 3.3536  | 0.0526 + | 0.325 +  | 0.992 +  | 0.271 +  | 0.988 +  | 0.0398 +   | 0.623 +    |
| 43   | -12798.30674 | 14.088  | 0.0001 - | 0.0092 - | 0.637 +  | 0.0092 - | 0.166 +  | 0.000167 - | 0.0115 -   |
| 44   | -12794.64234 | 10.424  | 0.0015 - | 0.0901 + | 0.774 +  | 0.0241 - | 0.333 +  | 0.00177 -  | 0.117 +    |
| 45   | -12794.04645 | 9.828   | 0.0169 + | 0.0993 + | 0.795 +  | 0.0988 + | 0.653 +  | 0.0141 +   | 0.148 +    |

|    |              |         |        |   |        |   |        |   |        |   |        |   |          |   |          |   |
|----|--------------|---------|--------|---|--------|---|--------|---|--------|---|--------|---|----------|---|----------|---|
| 46 | -12820.94593 | 36.727  | 0      | - | 0.0036 | - | 0.067  | + | 0.0006 | - | 0.0058 | - | 2.22e-06 | - | 3.14e-05 | - |
| 47 | -12802.43485 | 18.216  | 0      | - | 0.0031 | - | 0.44   | + | 0.0031 | - | 0.0723 | + | 0.000173 | - | 0.0197   | - |
| 48 | -12797.81776 | 13.599  | 0.0013 | - | 0.0682 | + | 0.627  | + | 0.0211 | - | 0.282  | + | 0.00115  | - | 0.0466   | - |
| 49 | -12795.97244 | 11.754  | 0.0007 | - | 0.0331 | - | 0.758  | + | 0.0329 | - | 0.419  | + | 0.000974 | - | 0.0608   | + |
| 50 | -12798.66996 | 14.452  | 0.0004 | - | 0.0537 | + | 0.618  | + | 0.0267 | - | 0.342  | + | 0.000643 | - | 0.0127   | - |
| 51 | -12806.30524 | 22.087  | 0      | - | 0.0079 | - | 0.29   | + | 0.0079 | - | 0.142  | + | 1.41e-05 | - | 2.61e-05 | - |
| 52 | -12806.65934 | 22.441  | 0      | - | 0.0068 | - | 0.282  | + | 0.0017 | - | 0.0314 | - | 3.95e-05 | - | 0.0229   | - |
| 53 | -12787.58331 | 3.3649  | 0.0043 | - | 0.309  | + | 0.996  | + | 0.176  | + | 0.966  | + | 0.00966  | + | 0.443    | + |
| 54 | -12796.63074 | 12.412  | 0.0015 | - | 0.0424 | - | 0.714  | + | 0.0422 | - | 0.448  | + | 0.00164  | - | 0.11     | + |
| 55 | -12787.41535 | 3.1969  | 0.0193 | + | 0.315  | + | 0.989  | + | 0.241  | + | 0.966  | + | 0.0219   | + | 0.465    | + |
| 56 | -12787.58322 | 3.3648  | 0.0053 | + | 0.309  | + | 0.996  | + | 0.176  | + | 0.974  | + | 0.00964  | + | 0.438    | + |
| 57 | -12793.22729 | 9.0089  | 0.0214 | + | 0.102  | + | 0.83   | + | 0.102  | + | 0.652  | + | 0.0169   | + | 0.169    | + |
| 58 | -12802.32836 | 18.11   | 0.0005 | - | 0.0205 | - | 0.438  | + | 0.0101 | - | 0.152  | + | 0.000562 | - | 0.0171   | - |
| 59 | -12787.41538 | 3.197   | 0.0223 | + | 0.315  | + | 0.989  | + | 0.24   | + | 0.984  | + | 0.0218   | + | 0.441    | + |
| 60 | -12788.64548 | 4.427   | 0.0003 | - | 0.239  | + | 0.983  | + | 0.0954 | + | 0.807  | + | 0.00356  | - | 0.0971   | + |
| 61 | -12795.77468 | 11.556  | 0.0205 | + | 0.0733 | + | 0.728  | + | 0.0731 | + | 0.561  | + | 0.0172   | + | 0.181    | + |
| 62 | -12786.94523 | 2.7268  | 0.0082 | + | 0.188  | + | 0.998  | + | 0.188  | + | 0.978  | + | 0.0101   | + | 0.571    | + |
| 63 | -12793.37546 | 9.157   | 0.0101 | + | 0.0715 | + | 0.872  | + | 0.0714 | + | 0.638  | + | 0.00718  | + | 0.198    | + |
| 64 | -12794.64221 | 10.424  | 0.0012 | - | 0.0906 | + | 0.774  | + | 0.0241 | - | 0.344  | + | 0.00178  | - | 0.115    | + |
| 65 | -12818.65065 | 34.432  | 0      | - | 0.0021 | - | 0.0691 | + | 0.0009 | - | 0.01   | - | 1.24e-06 | - | 0.000349 | - |
| 66 | -12827.22104 | 43.003  | 0      | - | 0      | - | 0.022  | - | 0      | - | 0.001  | - | 9.67e-10 | - | 6.12e-44 | - |
| 67 | -12794.72071 | 10.502  | 0.0111 | + | 0.0967 | + | 0.793  | + | 0.0965 | + | 0.72   | + | 0.00893  | + | 0.17     | + |
| 68 | -12801.12608 | 16.908  | 0.0025 | - | 0.0352 | - | 0.486  | + | 0.0138 | - | 0.194  | + | 0.00168  | - | 0.0433   | - |
| 69 | -12790.60696 | 6.3885  | 0.0001 | - | 0.0931 | + | 0.958  | + | 0.0926 | + | 0.779  | + | 0.00117  | - | 0.0312   | - |
| 70 | -12784.21852 | 8.5e-05 | 0.0259 | + | 0.508  | + | 1      | + | 0.508  | + | 1      | + | 0.0394   | + | 0.922    | + |
| 71 | -12802.43424 | 18.216  | 0.0002 | - | 0.0031 | - | 0.44   | + | 0.0031 | - | 0.0613 | + | 0.000176 | - | 0.0195   | - |
| 72 | -12786.63155 | 2.4131  | 0.0258 | + | 0.254  | + | 0.992  | + | 0.254  | + | 0.974  | + | 0.0261   | + | 0.553    | + |
| 73 | -12796.51177 | 12.293  | 0.0003 | - | 0.0552 | + | 0.726  | + | 0.0143 | - | 0.257  | + | 0.000367 | - | 0.0323   | - |
| 74 | -12788.64551 | 4.4271  | 0.0007 | - | 0.239  | + | 0.983  | + | 0.0955 | + | 0.833  | + | 0.00356  | - | 0.0939   | + |
| 75 | -12784.21866 | 0.00023 | 0.0398 | + | 0.505  | + | 1      | + | 0.496  | + | 1      | + | 0.0393   | + | 0.924    | + |
| 76 | -12815.67158 | 31.453  | 0      | - | 0.0005 | - | 0.102  | + | 0.0005 | - | 0.0162 | - | 6.14e-06 | - | 0.00531  | - |
| 77 | -12788.53339 | 4.315   | 0.0359 | + | 0.231  | + | 0.975  | + | 0.231  | + | 0.957  | + | 0.0318   | + | 0.609    | + |
| 78 | -12798.73932 | 14.521  | 0.0008 | - | 0.0187 | - | 0.614  | + | 0.0188 | - | 0.278  | + | 0.000657 | - | 0.0319   | - |
| 79 | -12786.49594 | 2.2775  | 0.0064 | + | 0.302  | + | 0.998  | + | 0.26   | + | 0.994  | + | 0.00941  | + | 0.408    | + |
| 80 | -12784.79628 | 0.57785 | 0.0514 | + | 0.457  | + | 1      | + | 0.457  | + | 1      | + | 0.0481   | + | 0.812    | + |
| 81 | -12784.21858 | 0.00014 | 0.0531 | + | 0.493  | + | 1      | + | 0.493  | + | 1      | + | 0.0397   | + | 0.82     | + |
| 82 | -12798.60699 | 14.389  | 0.0009 | - | 0.0392 | - | 0.616  | + | 0.0212 | - | 0.308  | + | 0.000747 | - | 0.0471   | - |
| 83 | -12792.61917 | 8.4007  | 0.0014 | - | 0.115  | + | 0.873  | + | 0.0314 | - | 0.395  | + | 0.00223  | - | 0.0873   | + |
| 84 | -12812.21799 | 28      | 0      | - | 0.0009 | - | 0.151  | + | 0.0008 | - | 0.022  | - | 1.11e-05 | - | 0.000391 | - |
| 85 | -12798.36576 | 14.147  | 0.0011 | - | 0.0703 | + | 0.603  | + | 0.018  | - | 0.242  | + | 0.00123  | - | 0.0488   | - |
| 86 | -12802.32857 | 18.11   | 0.0001 | - | 0.016  | - | 0.443  | + | 0.0101 | - | 0.181  | + | 0.000136 | - | 0.0129   | - |
| 87 | -12797.20467 | 12.986  | 0.001  | - | 0.0752 | + | 0.684  | + | 0.024  | - | 0.326  | + | 0.00112  | - | 0.0558   | + |
| 88 | -12797.18369 | 12.965  | 0.0006 | - | 0.0694 | + | 0.682  | + | 0.0159 | - | 0.255  | + | 0.000859 | - | 0.0181   | - |
| 89 | -12807.42679 | 23.208  | 0      | - | 0.0007 | - | 0.247  | + | 0.0007 | - | 0.0188 | - | 3.3e-05  | - | 0.000316 | - |
| 90 | -12794.42024 | 10.202  | 0.0107 | + | 0.0576 | + | 0.793  | + | 0.0573 | + | 0.511  | + | 0.00871  | + | 0.12     | + |
| 91 | -12787.58326 | 3.3648  | 0.0067 | + | 0.309  | + | 0.996  | + | 0.177  | + | 0.967  | + | 0.00964  | + | 0.448    | + |
| 92 | -12804.17509 | 19.957  | 0.001  | - | 0.0208 | - | 0.369  | + | 0.0089 | - | 0.137  | + | 0.000738 | - | 0.0156   | - |
| 93 | -12819.32203 | 35.104  | 0      | - | 0.0005 | - | 0.0573 | + | 0      | - | 0.0049 | - | 1.82e-08 | - | 0.00268  | - |
| 94 | -12789.53683 | 5.3184  | 0.0163 | + | 0.217  | + | 0.949  | + | 0.111  | + | 0.763  | + | 0.0134   | + | 0.287    | + |



```

95 -12788.89715 4.6787 0.0043 - 0.202 + 0.993 + 0.161 + 0.959 + 0.00426 + 0.395 +
96 -12790.78039 6.562 0.006 + 0.19 + 0.951 + 0.153 + 0.905 + 0.00745 + 0.259 +
97 -12821.28915 37.071 0 - 0.0005 - 0.0396 - 0.0001 - 0.0044 - 1.25e-07 - 5.22e-14 -
98 -12786.63169 2.4133 0.032 + 0.255 + 0.992 + 0.254 + 0.973 + 0.0262 + 0.558 +
99 -12787.17701 2.9586 0.0099 + 0.17 + 0.998 + 0.168 + 0.957 + 0.00939 + 0.526 +
100 -12794.67039 10.452 0.0158 + 0.136 + 0.778 + 0.0902 + 0.63 + 0.0134 + 0.175 +
101 -12795.95721 11.739 0.0004 - 0.0703 + 0.751 + 0.0234 - 0.347 + 0.000741 - 0.0926 +
102 -12790.72177 6.5033 0.0002 - 0.0773 + 0.978 + 0.077 + 0.807 + 0.000573 - 0.082 +
103 -12789.87216 5.6537 0.0501 + 0.261 + 0.948 + 0.222 + 0.925 + 0.0384 + 0.397 +
104 -12791.03157 6.8131 0.0077 + 0.0402 - 0.928 + 0.0393 - 0.45 + 0.00519 + 0.148 +
105 -12794.07212 9.8537 0.0009 - 0.036 - 0.855 + 0.036 - 0.458 + 0.000929 - 0.11 +
106 -12815.44845 31.23 0 - 0.0028 - 0.105 + 0.0008 - 0.0057 - 9.54e-07 - 0.00342 -
107 -12792.61909 8.4007 0.0015 - 0.115 + 0.873 + 0.0316 - 0.412 + 0.00222 - 0.0873 +

```

4. FGS fungal clade (#25, Figure 2) -- transfer from bacteria to fungi

TABLE SUMMARY

0/31 trees passing all tests violate proposed HGT

Consensus tree of trees passing all tests (newick format, UFBootstrap values provided):

```

(MBS82255.1 N GT4:0.3224437721,((PYT57412.1 N TPRs_REase:0.4601411188,((WP_013718337.1__N__TPRs_REas
e:0.4735340707,OQZ04106.1 N TPRs REase:0.2843763309)
57:0.0759619584,(KYF62697.1 N TPRs PNPase:0.7550867126,OGV08813.1__N__TPRs_REase:1.0213783886)
93:0.2357060982)71:0.1478463297)100:1.1303479686,WP_069042340.1 N GT4:1.2136221582)
77:0.2938474793,((TGO55078.1 fungaltran N FGS:0.1010656496,TGO34536.1__fungaltran_N_FGS:0.1285375924)
99:0.6159524469,RDW59160.1 fungaltran N FGS:0.4077773105)
60:0.0000028503,(TEA17700.1 fungaltran N FGS:0.5984228430,((KAF2994206.1 fungaltran N FGS:0.9969535327,(W
P_051977175.1 bfungaltran N FGS:0.3352793208,WP_136954386.1 bfungaltran N FGS:0.5518245400)
100:0.5741939265)35:0.0872225414,RAO64702.1__fungaltran_N_FGS:0.6072097770)26:0.0969540410)58:0.2085147687)
100:4.6755786689);

```

| Tree | logL         | deltaL | bp-RELL | p-KH       | p-SH     | p-WKH    | p-WSH    | c-ELW      | p-AU       |
|------|--------------|--------|---------|------------|----------|----------|----------|------------|------------|
| 1    | -13581.2866  | 0      | 0.0023  | - 0.504 +  | 1 +      | 0.491 +  | 1 +      | 0.0247 +   | 0.846 +    |
| 2    | -13585.20908 | 3.9225 | 0.0009  | - 0.185 +  | 0.992 +  | 0.113 +  | 0.883 +  | 0.00373 +  | 0.171 +    |
| 3    | -13659.799   | 78.512 | 0       | 0 -        | 0 -      | 0.0005 - | 0 -      | 7.63e-20 - | 3.03e-05 - |
| 4    | -13590.75813 | 9.4715 | 0.0021  | - 0.0628 + | 0.924 +  | 0.0628 + | 0.673 +  | 0.00216 -  | 0.133 +    |
| 5    | -13657.10799 | 75.821 | 0       | 0 -        | 0 -      | 0.0011 - | 0 -      | 1.57e-14 - | 2.37e-76 - |
| 6    | -13593.90755 | 12.621 | 0.0089  | + 0.0974 + | 0.799 +  | 0.0749 + | 0.587 +  | 0.00837 +  | 0.124 +    |
| 7    | -13585.75863 | 4.472  | 0.0003  | - 0.154 +  | 0.991 +  | 0.11 +   | 0.883 +  | 0.00104 -  | 0.0789 +   |
| 8    | -13589.19333 | 7.9067 | 0.002   | - 0.06 +   | 0.956 +  | 0.0601 + | 0.66 +   | 0.00198 -  | 0.138 +    |
| 9    | -13585.38739 | 4.1008 | 0.0308  | + 0.248 +  | 0.979 +  | 0.208 +  | 0.934 +  | 0.0277 +   | 0.395 +    |
| 10   | -13621.81951 | 40.533 | 0       | - 0.0006 - | 0.0669 + | 0.0003 - | 0.0105 - | 9.77e-08 - | 0.000543 - |
| 11   | -13608.83135 | 27.545 | 0.0002  | - 0.0101 - | 0.273 +  | 0.0078 - | 0.104 +  | 0.000185 - | 0.00334 -  |
| 12   | -13654.6103  | 73.324 | 0       | 0 -        | 0 -      | 0.0022 - | 0 -      | 2.52e-15 - | 1.86e-06 - |
| 13   | -13673.5292  | 92.243 | 0       | 0 -        | 0 -      | 0.0001 - | 0 -      | 8.34e-19 - | 0.000164 - |
| 14   | -13588.54962 | 7.263  | 0.0208  | + 0.143 +  | 0.951 +  | 0.1 +    | 0.737 +  | 0.0183 +   | 0.237 +    |
| 15   | -13588.28193 | 6.9953 | 0.0369  | + 0.179 +  | 0.934 +  | 0.155 +  | 0.825 +  | 0.0308 +   | 0.277 +    |

|    |              |         |        |   |        |   |        |   |        |   |        |   |          |   |          |   |
|----|--------------|---------|--------|---|--------|---|--------|---|--------|---|--------|---|----------|---|----------|---|
| 16 | -13601.21806 | 19.931  | 0.0009 | - | 0.0317 | - | 0.498  | + | 0.0188 | - | 0.217  | + | 0.000974 | - | 0.00943  | - |
| 17 | -13591.37788 | 10.091  | 0.0032 | + | 0.0976 | + | 0.875  | + | 0.0404 | - | 0.48   | + | 0.00256  | + | 0.087    | + |
| 18 | -13611.17828 | 29.892  | 0.0005 | - | 0.0075 | - | 0.214  | + | 0.0037 | - | 0.0503 | + | 0.000323 | - | 0.00367  | - |
| 19 | -13633.47253 | 52.186  | 0      | - | 0.0002 | - | 0.0289 | - | 0      | - | 0.0002 | - | 2.95e-10 | - | 9.44e-08 | - |
| 20 | -13603.86592 | 22.579  | 0.0002 | - | 0.0134 | - | 0.411  | + | 0.0045 | - | 0.0943 | + | 0.000213 | - | 0.00112  | - |
| 21 | -13585.5917  | 4.3051  | 0.0003 | - | 0.259  | + | 0.992  | + | 0.106  | + | 0.894  | + | 0.00186  | - | 0.0692   | + |
| 22 | -13581.52031 | 0.23371 | 0.0015 | - | 0.485  | + | 1      | + | 0.485  | + | 1      | + | 0.0223   | + | 0.833    | + |
| 23 | -13618.12236 | 36.836  | 0      | - | 0.0069 | - | 0.13   | + | 0.0036 | - | 0.0422 | - | 4.07e-05 | - | 0.0049   | - |
| 24 | -13583.91425 | 2.6276  | 0.0279 | + | 0.309  | + | 0.997  | + | 0.271  | + | 0.99   | + | 0.0238   | + | 0.627    | + |
| 25 | -13587.39605 | 6.1095  | 0.0017 | - | 0.184  | + | 0.96   | + | 0.0577 | + | 0.62   | + | 0.00271  | + | 0.163    | + |
| 26 | -13582.259   | 0.9724  | 0.0539 | + | 0.426  | + | 0.998  | + | 0.397  | + | 0.997  | + | 0.0445   | + | 0.621    | + |
| 27 | -13581.52036 | 0.23376 | 0.0064 | + | 0.485  | + | 1      | + | 0.485  | + | 1      | + | 0.0223   | + | 0.837    | + |
| 28 | -13581.3907  | 0.1041  | 0.0514 | + | 0.493  | + | 1      | + | 0.493  | + | 1      | + | 0.0445   | + | 0.829    | + |
| 29 | -13626.98853 | 45.702  | 0      | - | 0.0004 | - | 0.0345 | - | 0.0003 | - | 0.0035 | - | 1.22e-09 | - | 0.00038  | - |
| 30 | -13587.78449 | 6.4979  | 0.0083 | + | 0.199  | + | 0.963  | + | 0.154  | + | 0.893  | + | 0.00852  | + | 0.206    | + |
| 31 | -13583.94996 | 2.6634  | 0.0415 | + | 0.329  | + | 0.996  | + | 0.305  | + | 0.99   | + | 0.0335   | + | 0.572    | + |
| 32 | -13601.01179 | 19.725  | 0.0001 | - | 0.016  | - | 0.508  | + | 0.0048 | - | 0.0948 | + | 0.00014  | - | 0.0215   | - |
| 33 | -13583.8218  | 2.5352  | 0.0352 | + | 0.372  | + | 0.996  | + | 0.328  | + | 0.995  | + | 0.029    | + | 0.662    | + |
| 34 | -13594.65498 | 13.368  | 0.0045 | + | 0.0486 | - | 0.754  | + | 0.0433 | - | 0.446  | + | 0.00407  | + | 0.0879   | + |
| 35 | -13584.96705 | 3.6805  | 0.0057 | + | 0.304  | + | 0.992  | + | 0.214  | + | 0.972  | + | 0.00766  | + | 0.31     | + |
| 36 | -13586.46771 | 5.1811  | 0.001  | - | 0.231  | + | 0.99   | + | 0.15   | + | 0.951  | + | 0.00228  | - | 0.207    | + |
| 37 | -13591.69506 | 10.408  | 0.0061 | + | 0.122  | + | 0.866  | + | 0.0635 | + | 0.591  | + | 0.00487  | + | 0.0974   | + |
| 38 | -13581.52034 | 0.23374 | 0.0098 | + | 0.486  | + | 1      | + | 0.486  | + | 1      | + | 0.0222   | + | 0.837    | + |
| 39 | -13595.41567 | 14.129  | 0.0013 | - | 0.0689 | + | 0.732  | + | 0.0216 | - | 0.3    | + | 0.00149  | - | 0.0699   | + |
| 40 | -13604.36611 | 23.08   | 0.0008 | - | 0.0319 | - | 0.389  | + | 0.006  | - | 0.0732 | + | 0.000598 | - | 0.0129   | - |
| 41 | -13585.13379 | 3.8472  | 0.0008 | + | 0.247  | + | 0.99   | + | 0.209  | + | 0.965  | + | 0.00725  | + | 0.316    | + |
| 42 | -13592.27308 | 10.986  | 0.0001 | - | 0.125  | + | 0.824  | + | 0.0358 | - | 0.432  | + | 0.00183  | - | 0.108    | + |
| 43 | -13585.59152 | 4.3049  | 0.0002 | - | 0.259  | + | 0.992  | + | 0.106  | + | 0.894  | + | 0.00189  | - | 0.117    | + |
| 44 | -13592.27548 | 10.989  | 0.0008 | - | 0.125  | + | 0.824  | + | 0.0358 | - | 0.422  | + | 0.00185  | - | 0.112    | + |
| 45 | -13584.7934  | 3.5068  | 0.0612 | + | 0.286  | + | 0.982  | + | 0.249  | + | 0.955  | + | 0.0497   | + | 0.485    | + |
| 46 | -13599.77539 | 18.489  | 0      | - | 0.0165 | - | 0.565  | + | 0.0028 | - | 0.0567 | + | 9.27e-06 | - | 0.00186  | - |
| 47 | -13585.59167 | 4.3051  | 0.0004 | - | 0.259  | + | 0.992  | + | 0.106  | + | 0.904  | + | 0.00186  | - | 0.0704   | + |
| 48 | -13589.19992 | 7.9133  | 0.0001 | - | 0.0379 | - | 0.949  | + | 0.0348 | - | 0.51   | + | 0.00049  | - | 0.0573   | + |
| 49 | -13581.52036 | 0.23376 | 0.0138 | + | 0.485  | + | 1      | + | 0.485  | + | 1      | + | 0.0223   | + | 0.834    | + |
| 50 | -13606.99709 | 25.71   | 0.0007 | - | 0.0196 | - | 0.324  | + | 0.0089 | - | 0.12   | + | 0.000593 | - | 0.0163   | - |
| 51 | -13590.66951 | 9.3829  | 0.0059 | + | 0.143  | + | 0.894  | + | 0.0857 | + | 0.705  | + | 0.00538  | + | 0.127    | + |
| 52 | -13584.68149 | 3.3949  | 0.0522 | + | 0.338  | + | 0.99   | + | 0.291  | + | 0.984  | + | 0.0394   | + | 0.608    | + |
| 53 | -13586.95075 | 5.6642  | 0.0039 | + | 0.0674 | + | 0.97   | + | 0.067  | + | 0.673  | + | 0.00381  | + | 0.162    | + |
| 54 | -13581.29565 | 0.00905 | 0.0098 | + | 0.447  | + | 1      | + | 0.447  | + | 1      | + | 0.0245   | + | 0.743    | + |
| 55 | -13591.9575  | 10.671  | 0.0016 | - | 0.0355 | - | 0.849  | + | 0.0149 | - | 0.245  | + | 0.00174  | - | 0.0681   | + |
| 56 | -13586.44704 | 5.1604  | 0.003  | + | 0.0717 | + | 0.973  | + | 0.065  | + | 0.642  | + | 0.00462  | + | 0.269    | + |
| 57 | -13586.157   | 4.8704  | 0.0138 | + | 0.192  | + | 0.983  | + | 0.192  | + | 0.95   | + | 0.0131   | + | 0.404    | + |
| 58 | -13583.64202 | 2.3554  | 0.004  | + | 0.188  | + | 0.999  | + | 0.181  | + | 0.975  | + | 0.00602  | + | 0.399    | + |
| 59 | -13600.9955  | 19.709  | 0.0003 | - | 0.0189 | - | 0.515  | + | 0.0193 | - | 0.257  | + | 0.000281 | - | 0.0361   | - |
| 60 | -13609.34697 | 28.06   | 0.0001 | - | 0.0114 | - | 0.251  | + | 0.0054 | - | 0.0775 | + | 0.00016  | - | 0.00331  | - |
| 61 | -13581.52033 | 0.23373 | 0.0156 | + | 0.485  | + | 1      | + | 0.485  | + | 1      | + | 0.0223   | + | 0.836    | + |
| 62 | -13590.72017 | 9.4336  | 0.0046 | + | 0.069  | + | 0.879  | + | 0.0697 | + | 0.596  | + | 0.00398  | + | 0.108    | + |
| 63 | -13582.49841 | 1.2118  | 0.0311 | + | 0.356  | + | 0.998  | + | 0.356  | + | 0.996  | + | 0.0218   | + | 0.513    | + |
| 64 | -13592.68887 | 11.402  | 0.0008 | - | 0.0735 | + | 0.864  | + | 0.0545 | + | 0.597  | + | 0.000983 | - | 0.0619   | + |

|     |              |         |        |   |        |   |        |   |        |   |        |   |          |   |          |   |
|-----|--------------|---------|--------|---|--------|---|--------|---|--------|---|--------|---|----------|---|----------|---|
| 65  | -13587.07021 | 5.7836  | 0.0111 | + | 0.225  | + | 0.968  | + | 0.146  | + | 0.871  | + | 0.00993  | + | 0.276    | + |
| 66  | -13581.29572 | 0.00912 | 0.0148 | + | 0.448  | + | 1      | + | 0.448  | + | 1      | + | 0.0244   | + | 0.758    | + |
| 67  | -13584.26327 | 2.9767  | 0.0179 | + | 0.235  | + | 0.996  | + | 0.235  | + | 0.982  | + | 0.0152   | + | 0.544    | + |
| 68  | -13600.61419 | 19.328  | 0.0019 | - | 0.0387 | - | 0.522  | + | 0.0389 | - | 0.339  | + | 0.00192  | - | 0.0208   | - |
| 69  | -13599.61893 | 18.332  | 0.0008 | - | 0.0171 | - | 0.57   | + | 0.0147 | - | 0.199  | + | 0.000815 | - | 0.0302   | - |
| 70  | -13593.02083 | 11.734  | 0.0009 | - | 0.022  | - | 0.816  | + | 0.0222 | - | 0.323  | + | 0.000855 | - | 0.0342   | - |
| 71  | -13594.26268 | 12.976  | 0.0063 | + | 0.0898 | + | 0.778  | + | 0.055  | + | 0.495  | + | 0.00532  | + | 0.106    | + |
| 72  | -13597.63473 | 16.348  | 0.0018 | - | 0.0349 | - | 0.63   | + | 0.0342 | - | 0.36   | + | 0.00171  | - | 0.0291   | - |
| 73  | -13589.98998 | 8.7034  | 0.006  | + | 0.079  | + | 0.897  | + | 0.0777 | + | 0.639  | + | 0.0048   | + | 0.103    | + |
| 74  | -13596.44034 | 15.154  | 0.0001 | - | 0.033  | - | 0.699  | + | 0.0045 | - | 0.0916 | + | 4.57e-05 | - | 0.000374 | - |
| 75  | -13583.19252 | 1.9059  | 0.0049 | + | 0.38   | + | 1      | + | 0.183  | + | 0.976  | + | 0.00789  | + | 0.528    | + |
| 76  | -13586.48652 | 5.1999  | 0.0056 | + | 0.0704 | + | 0.974  | + | 0.0636 | + | 0.643  | + | 0.00427  | + | 0.187    | + |
| 77  | -13585.54484 | 4.2582  | 0.0445 | + | 0.287  | + | 0.975  | + | 0.207  | + | 0.923  | + | 0.0321   | + | 0.387    | + |
| 78  | -13585.19435 | 3.9077  | 0.0058 | + | 0.246  | + | 0.991  | + | 0.207  | + | 0.97   | + | 0.00637  | + | 0.383    | + |
| 79  | -13600.99006 | 19.703  | 0.0001 | - | 0.0139 | - | 0.515  | + | 0.0057 | - | 0.0998 | + | 0.000195 | - | 0.00654  | - |
| 80  | -13592.21403 | 10.927  | 0.0017 | - | 0.114  | + | 0.838  | + | 0.0302 | - | 0.414  | + | 0.002    | - | 0.0758   | + |
| 81  | -13622.39167 | 41.105  | 0      | - | 0.0001 | - | 0.0605 | + | 0.0002 | - | 0.0027 | - | 4.89e-10 | - | 1.8e-240 | - |
| 82  | -13581.6517  | 0.3651  | 0.0263 | + | 0.475  | + | 1      | + | 0.46   | + | 1      | + | 0.0238   | + | 0.748    | + |
| 83  | -13609.16712 | 27.881  | 0      | - | 0.006  | - | 0.255  | + | 0.0029 | - | 0.033  | - | 9.63e-06 | - | 0.00912  | - |
| 84  | -13586.9424  | 5.6558  | 0.0059 | + | 0.215  | + | 0.968  | + | 0.0693 | + | 0.675  | + | 0.00443  | + | 0.22     | + |
| 85  | -13587.43868 | 6.1521  | 0.0025 | - | 0.18   | + | 0.961  | + | 0.055  | + | 0.633  | + | 0.00235  | - | 0.177    | + |
| 86  | -13608.15901 | 26.872  | 0      | - | 0.0074 | - | 0.276  | + | 0.0045 | - | 0.0768 | + | 6.39e-06 | - | 0.0093   | - |
| 87  | -13590.75283 | 9.4662  | 0.0003 | - | 0.0541 | + | 0.903  | + | 0.0322 | - | 0.474  | + | 0.000803 | - | 0.0515   | + |
| 88  | -13589.74847 | 8.4619  | 0.0107 | + | 0.129  | + | 0.919  | + | 0.129  | + | 0.838  | + | 0.00939  | + | 0.175    | + |
| 89  | -13584.5463  | 3.2597  | 0.0055 | + | 0.322  | + | 0.997  | + | 0.23   | + | 0.99   | + | 0.00738  | + | 0.423    | + |
| 90  | -13581.29565 | 0.00905 | 0.0181 | + | 0.448  | + | 1      | + | 0.448  | + | 1      | + | 0.0245   | + | 0.606    | + |
| 91  | -13591.10115 | 9.8146  | 0.0017 | - | 0.0641 | + | 0.907  | + | 0.0613 | + | 0.639  | + | 0.00174  | - | 0.104    | + |
| 92  | -13581.28696 | 0.00036 | 0.024  | + | 0.509  | + | 1      | + | 0.509  | + | 1      | + | 0.0249   | + | 0.868    | + |
| 93  | -13585.75871 | 4.4721  | 0.0003 | - | 0.154  | + | 0.991  | + | 0.11   | + | 0.891  | + | 0.00104  | - | 0.0806   | + |
| 94  | -13587.43868 | 6.1521  | 0.0017 | - | 0.18   | + | 0.961  | + | 0.055  | + | 0.639  | + | 0.00235  | + | 0.171    | + |
| 95  | -13581.65185 | 0.36525 | 0.0249 | + | 0.475  | + | 1      | + | 0.46   | + | 1      | + | 0.0239   | + | 0.748    | + |
| 96  | -13592.27458 | 10.988  | 0.0019 | - | 0.124  | + | 0.824  | + | 0.0358 | - | 0.428  | + | 0.00179  | - | 0.108    | + |
| 97  | -13585.26811 | 3.9815  | 0.0022 | - | 0.109  | + | 0.993  | + | 0.109  | + | 0.871  | + | 0.00311  | + | 0.284    | + |
| 98  | -13581.28675 | 0.00016 | 0.0316 | + | 0.496  | + | 1      | + | 0.496  | + | 1      | + | 0.0246   | + | 0.848    | + |
| 99  | -13597.2356  | 15.949  | 0.0004 | - | 0.038  | - | 0.679  | + | 0.0148 | - | 0.25   | + | 0.000453 | - | 0.0174   | - |
| 100 | -13592.84592 | 11.559  | 0.0026 | - | 0.0479 | - | 0.831  | + | 0.0478 | - | 0.51   | + | 0.00206  | - | 0.081    | + |
| 101 | -13583.30391 | 2.0173  | 0.0132 | + | 0.18   | + | 0.997  | + | 0.18   | + | 0.954  | + | 0.00893  | + | 0.413    | + |
| 102 | -13596.26849 | 14.982  | 0.0036 | + | 0.0398 | - | 0.684  | + | 0.0399 | - | 0.391  | + | 0.00288  | + | 0.102    | + |
| 103 | -13581.52098 | 0.23438 | 0.0278 | + | 0.485  | + | 1      | + | 0.485  | + | 1      | + | 0.0221   | + | 0.847    | + |
| 104 | -13592.27445 | 10.988  | 0.0024 | - | 0.124  | + | 0.823  | + | 0.0356 | - | 0.43   | + | 0.00183  | - | 0.11     | + |
| 105 | -13595.39112 | 14.105  | 0.0056 | + | 0.0912 | + | 0.705  | + | 0.0554 | + | 0.498  | + | 0.00483  | + | 0.0811   | + |
| 106 | -13592.02818 | 10.742  | 0.0014 | - | 0.0801 | + | 0.851  | + | 0.0145 | - | 0.246  | + | 0.000971 | - | 0.0553   | + |
| 107 | -13595.40474 | 14.118  | 0.0016 | - | 0.031  | - | 0.726  | + | 0.0266 | - | 0.33   | + | 0.00164  | - | 0.0875   | + |
| 108 | -13591.45064 | 10.164  | 0.0046 | + | 0.0789 | + | 0.865  | + | 0.0348 | - | 0.42   | + | 0.00457  | + | 0.0828   | + |
| 109 | -13582.74176 | 1.4552  | 0.0353 | + | 0.406  | + | 0.999  | + | 0.308  | + | 0.997  | + | 0.022    | + | 0.611    | + |
| 110 | -13613.42732 | 32.141  | 0      | - | 0.0011 | - | 0.151  | + | 0.0011 | - | 0.0251 | - | 5.61e-08 | - | 0.000411 | - |
| 111 | -13595.00669 | 13.72   | 0.0014 | - | 0.0219 | - | 0.741  | + | 0.0218 | - | 0.282  | + | 0.00111  | - | 0.0234   | - |
| 112 | -13586.9845  | 5.6979  | 0.0058 | + | 0.212  | + | 0.968  | + | 0.0774 | + | 0.717  | + | 0.00529  | + | 0.19     | + |
| 113 | -13594.42551 | 13.139  | 0.0035 | + | 0.0993 | + | 0.749  | + | 0.0384 | - | 0.422  | + | 0.00264  | + | 0.0783   | + |

114 -13586.31105 5.0244 0.0096 + 0.17 + 0.978 + 0.0881 + 0.768 + 0.00944 + 0.305 +
