# Supplementary material
Source: PubMed Central journal article supplement (PMC10294775)

Alignment of bNAUGHT1 to eukaryotic NACT domain-containing proteins

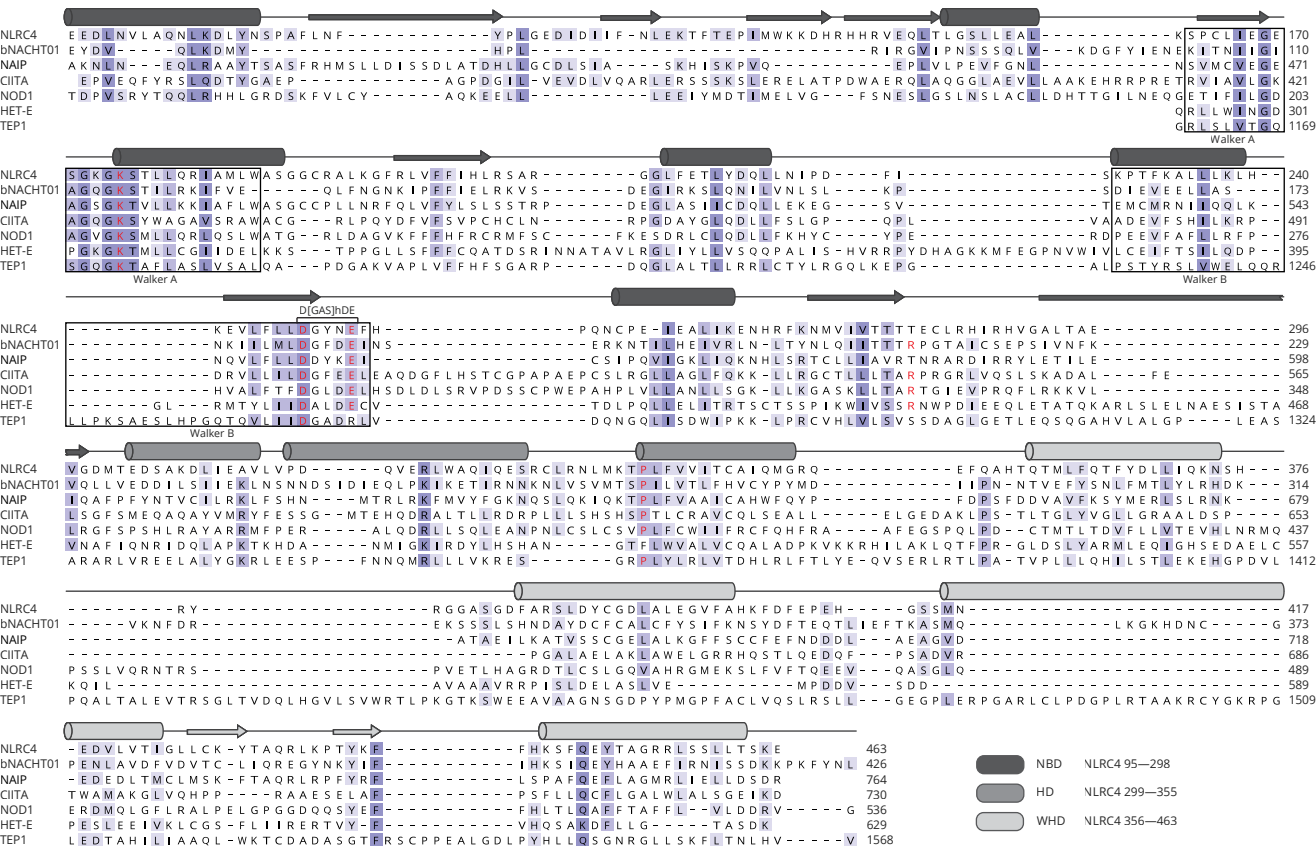

**B**

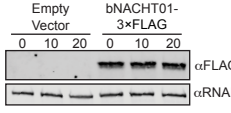

**C**

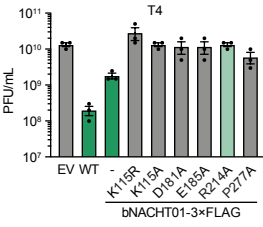

**D**

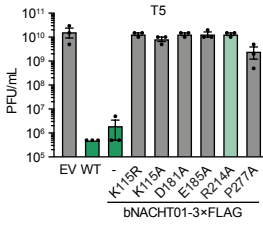

**E**

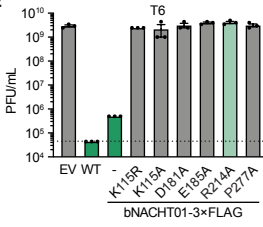

**F**

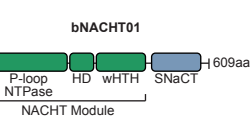

**G**

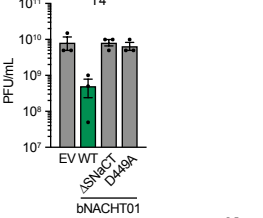

**H**

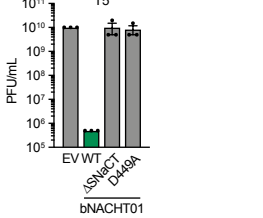

**I**

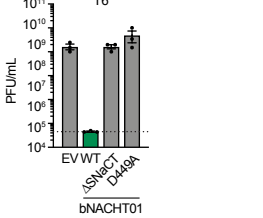

**J**

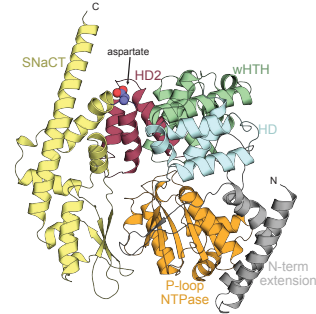

**K**

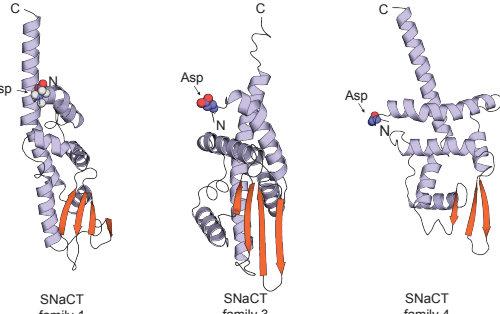

Supplement: NIHMS1893070-supplement-1.pdf [file NIHMS1893070-supplement-1.pdf]

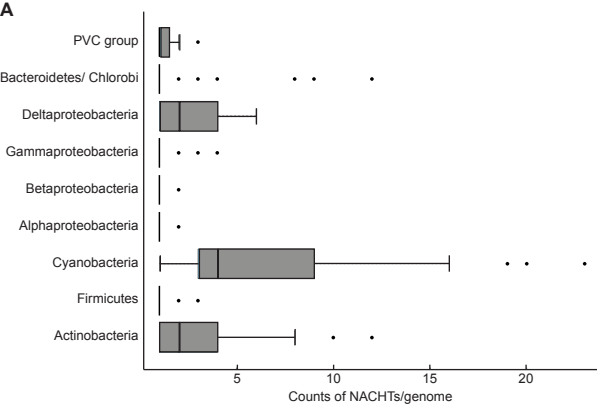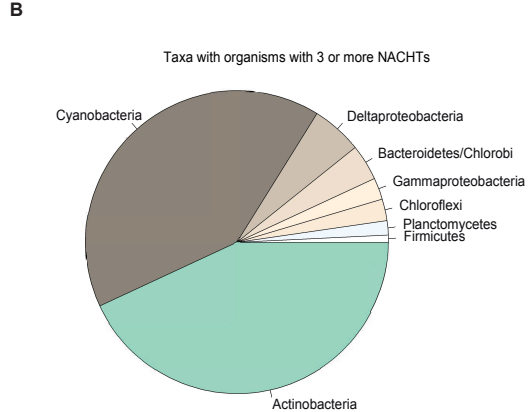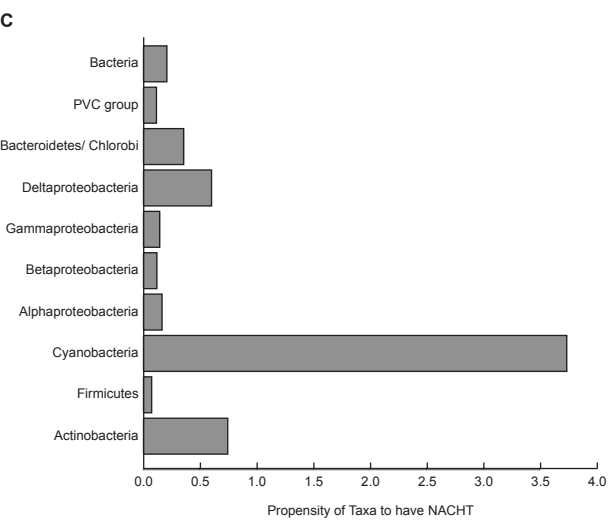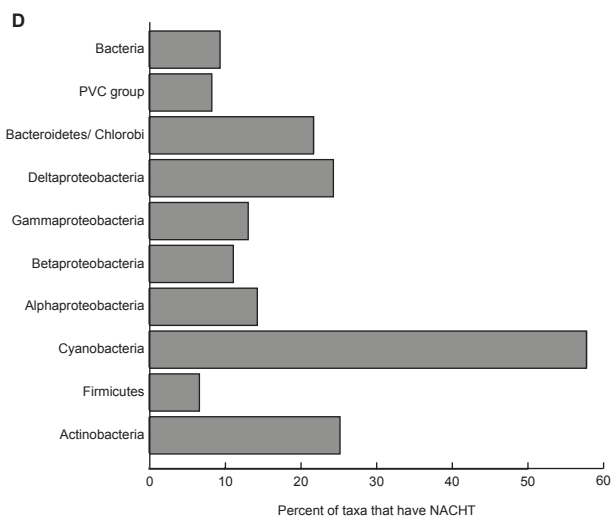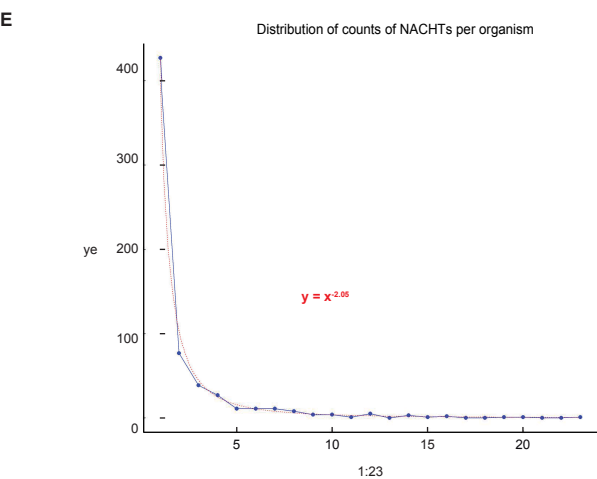

Supplement: NIHMS1893070-supplement-2.pdf [file NIHMS1893070-supplement-2.pdf]

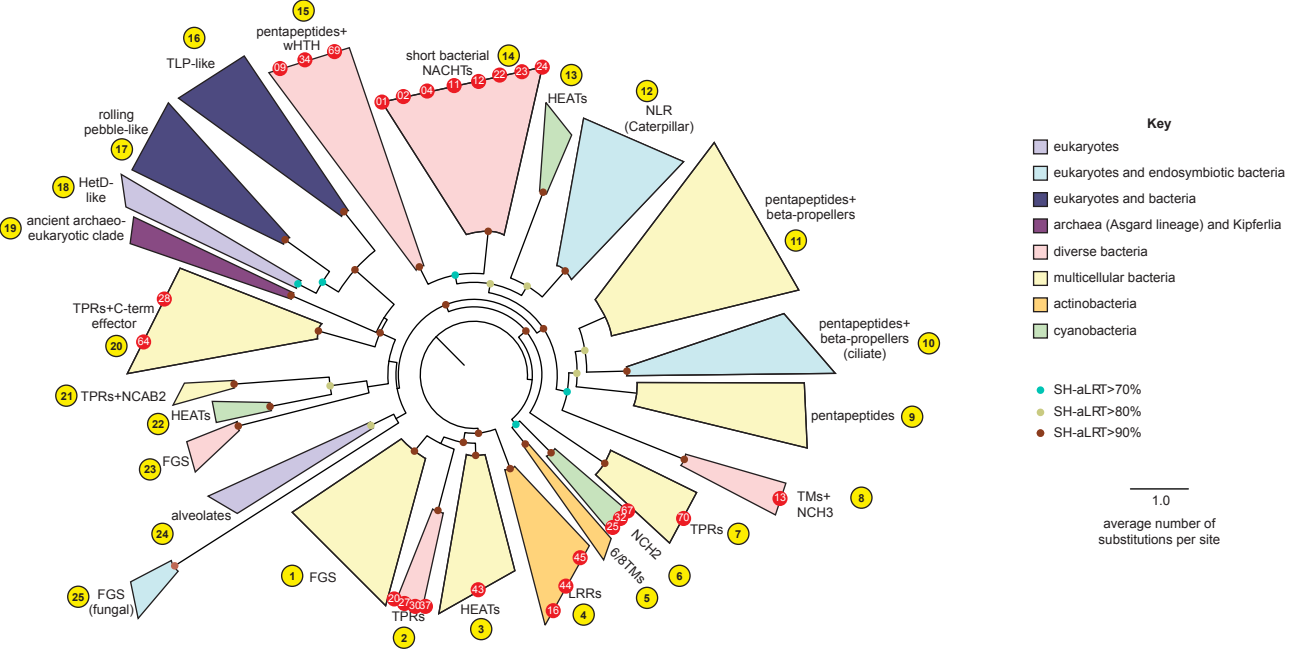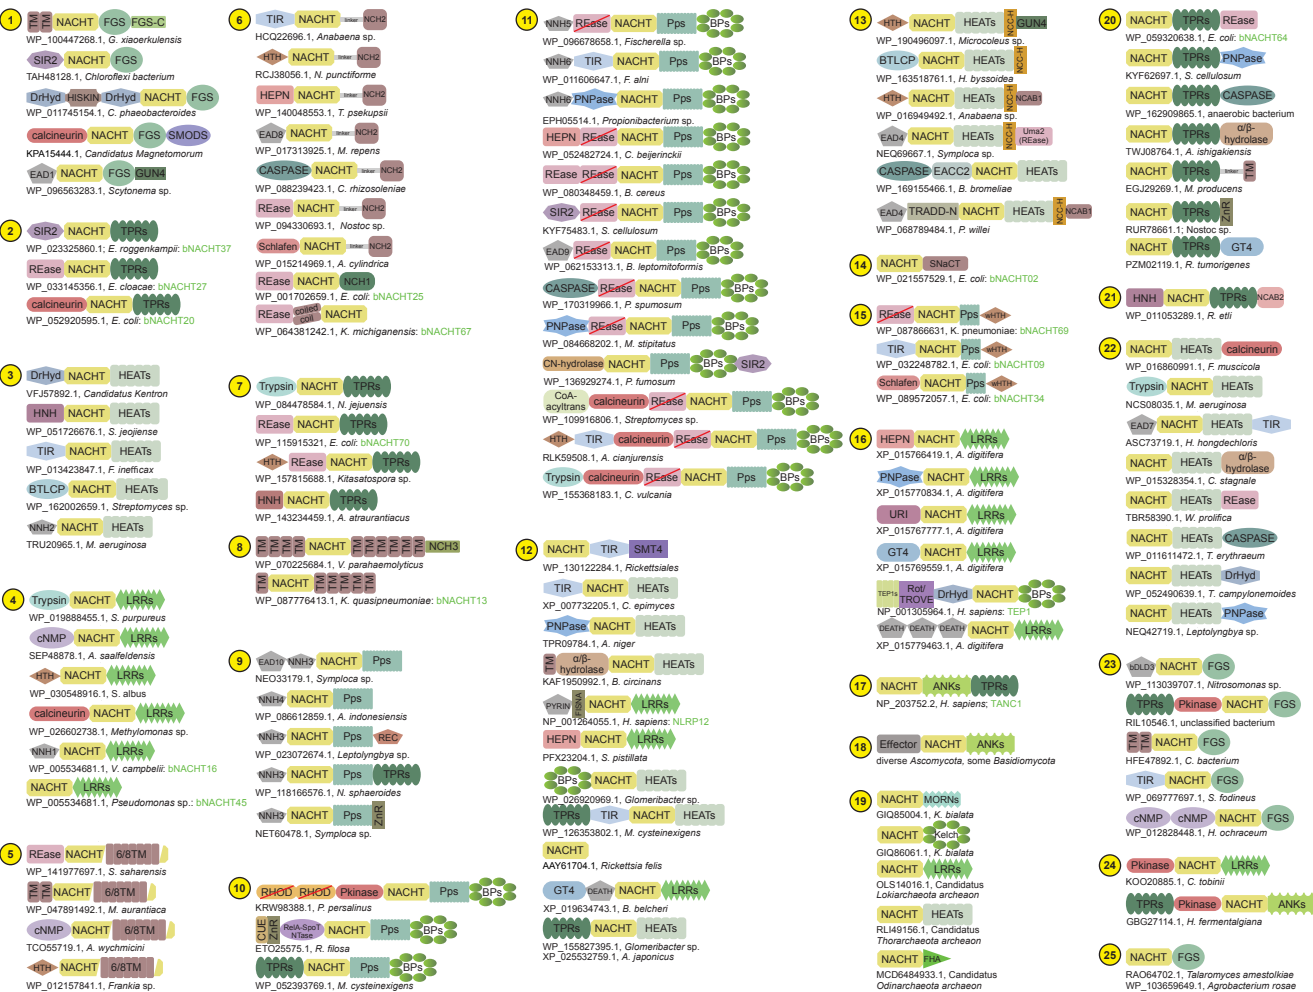

Supplement: NIHMS1893070-supplement-3.pdf [file NIHMS1893070-supplement-3.pdf]

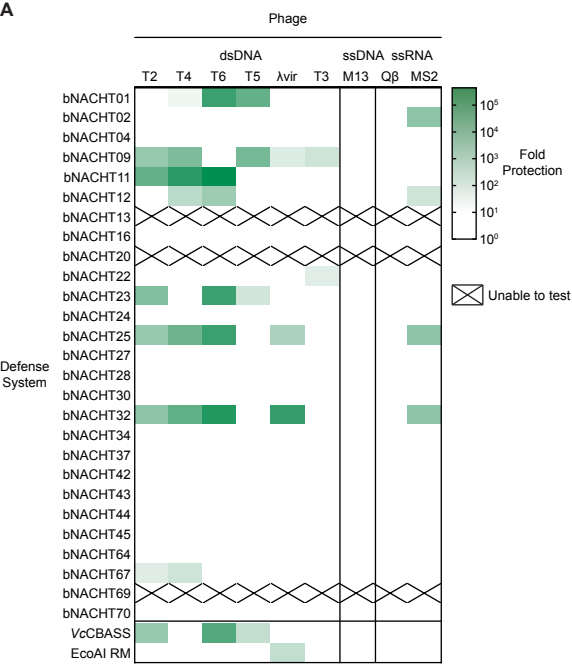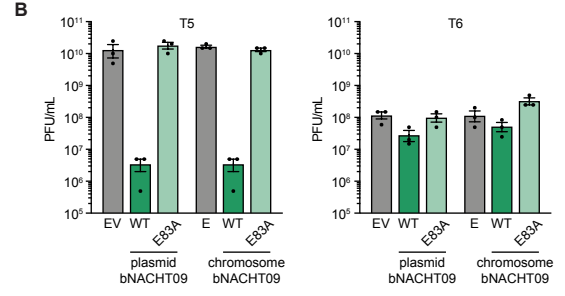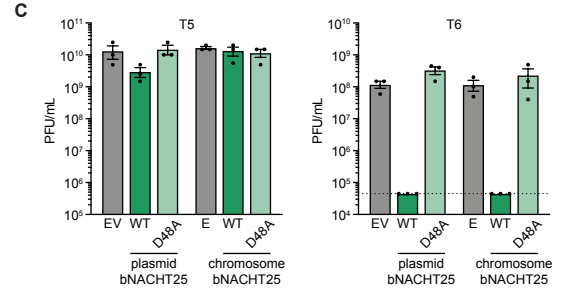

Supplement: NIHMS1893070-supplement-5.pdf [file NIHMS1893070-supplement-5.pdf]

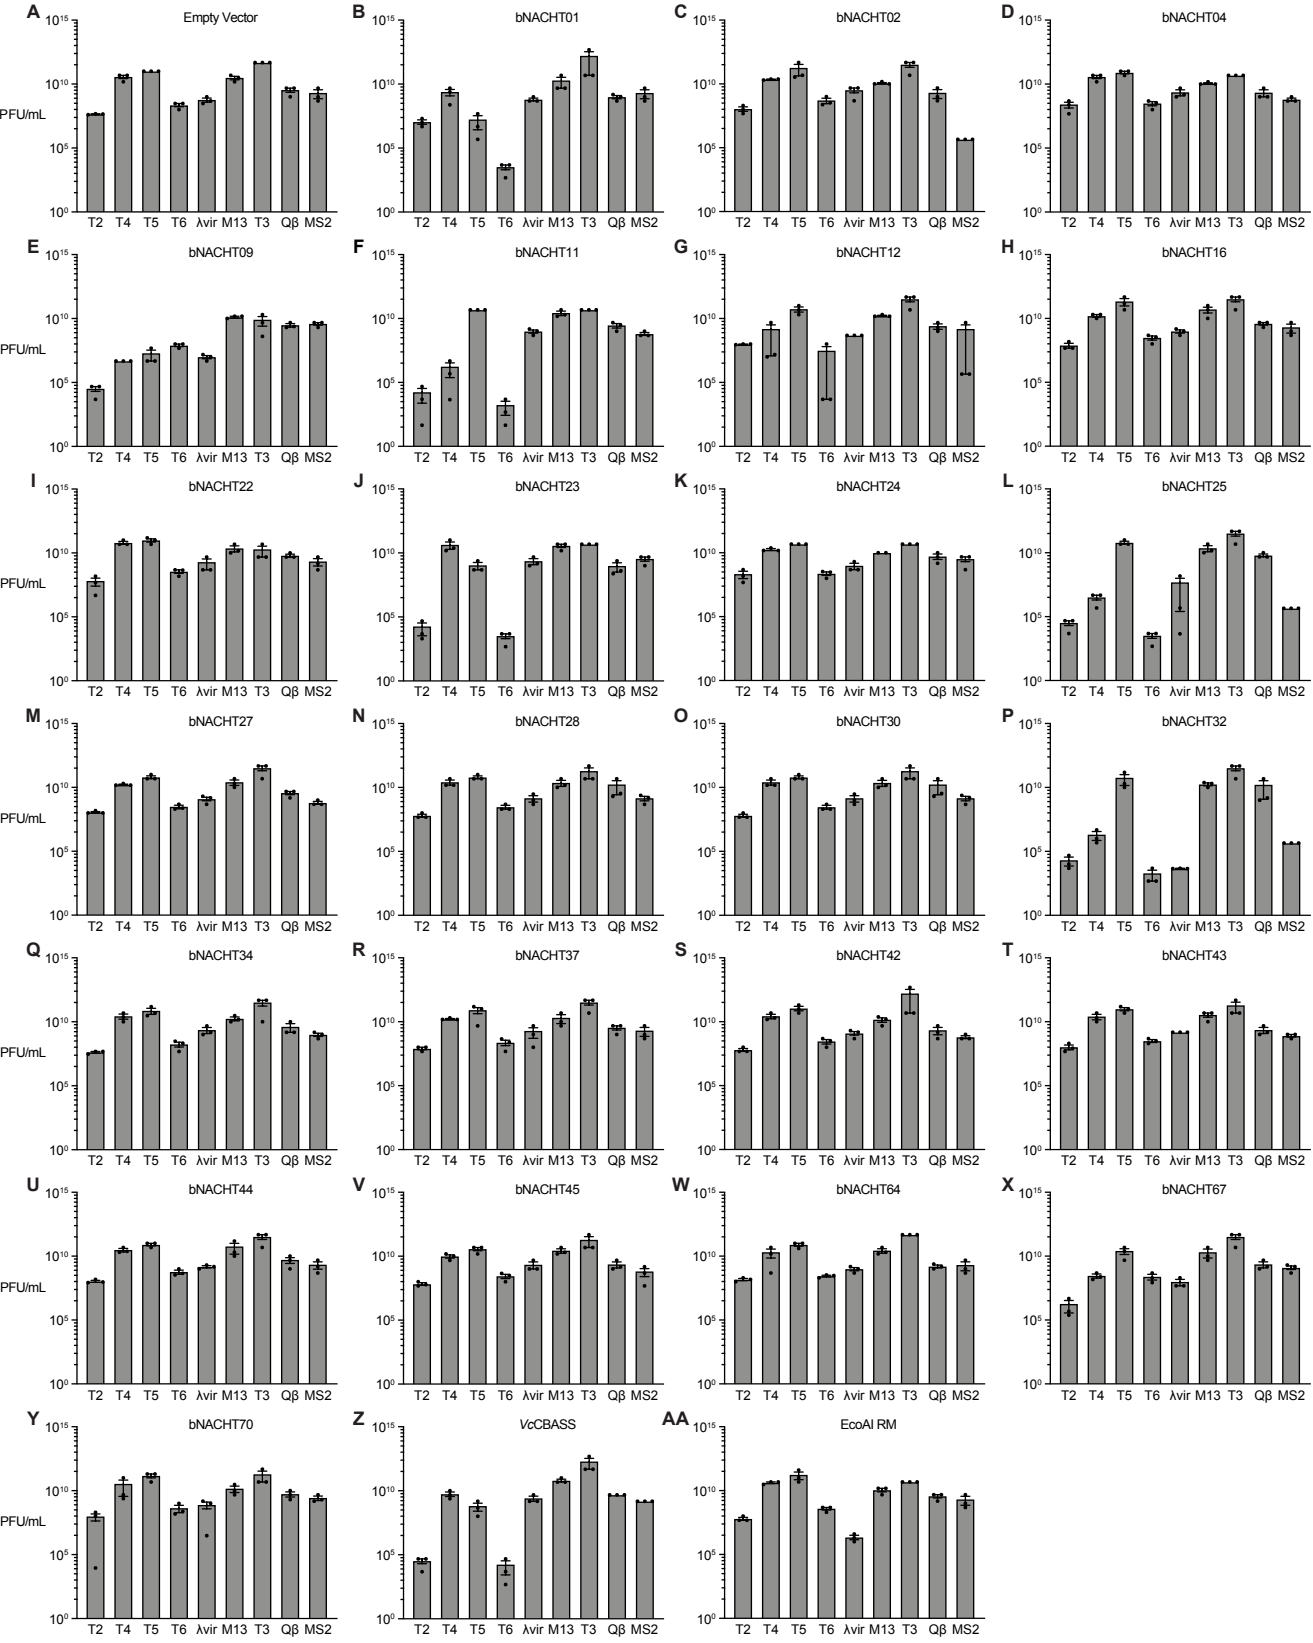

Supplement: NIHMS1893070-supplement-6.pdf [file NIHMS1893070-supplement-6.pdf]
